# Supplementary material
Source: publisher figshare collection journal article supplement (https://gsapubs.figshare.com/ndownloader/files/22410507)
Supplement: Supplementary file 1 [file 22410507]

## Sheet: ISS and ISKK UPb ages
REFERENCE1	LOCATION	SAMPLE NAME	MATERIAL	SPOT NAME	ANALYSIS DATE	STANDARDS6	% errors are all 1σ; Pb* denotes radiogenic proportion of Pb; common Pb (PbC) corrected by assuming 206Pb/238U-207Pb/235U age concordance; Pb-corr indicates correction made using the corresponding Pb values;
							204Pb/ 206Pb	% error	206Pb/ 238U	% error	U (ppm)	Th (ppm)	232Th/ 238U	% error	Total 238U/206Pb	% error	Total 207Pb/206Pb	% error	207Pb-corr 204Pb/206Pb	207Pb-corr % 206PbC	204Pb-corr 207Pb*/235U	% error	204Pb-corr 206Pb*/238U	% error	Error Corr.	207Pb-corr 206Pb/238U Age (Ma)	1σ error	Mount
Carley 2014.	Storaá	ISS.	Zircon	ISS_10.1	Jan. '13.	R33 zircon (419±1 Ma), Black et al. (2004).	0.00121901	57.7526	0.0037089	1.50692			0.616212	0.543552	486.47	1.16845	0.04676	7.04965	2.98476e-05	0.0557651	0.00785327	40.2066	0.00200881	1.7824	0.044331	13.2304	0.164043	TLC2.
Carley 2014.	Storaá	ISS.	Zircon	ISS_12.1	Jan. '13.	R33 zircon (419±1 Ma), Black et al. (2004).	0.00417488	50.0522	0.00370706	6.28565			0.46384	0.312461	513.94	4.3065	0.0462912	11.4839	-9.97054e-07	-0.00186293	0.00508618	73.7344	0.00179398	6.03971	0.0819117	12.5312	0.545836	TLC2.
Carley 2014.	Storaá	ISS.	Zircon	ISS_14.1	Jan. '13.	R33 zircon (419±1 Ma), Black et al. (2004).	0.00240064	70.7531	0.00329767	8.21475			0.412913	0.686813	506.147	7.55332	0.06172	10.853	0.00104411	1.95086	0.00659238	110.224	0.00188709	8.25182	0.0748638	12.4757	0.947854	TLC2.
Carley 2014.	Storaá	ISS.	Zircon	ISS_15.1	Jan. '13.	R33 zircon (419±1 Ma), Black et al. (2004).	0.00244097	35.3769	0.00320848	3.55369			0.965116	0.562767	488.734	0.661733	0.0508314	5.86302	0.000305784	0.571312	0.00357761	107.356	0.00195279	1.81539	0.01691	13.1013	0.0998597	TLC2.
Carley 2014.	Storaá	ISS.	Zircon	ISS_18.1	Jan. '13.	R33 zircon (419±1 Ma), Black et al. (2004).	0.0006318	100.016	0.00339675	2.11941			0.472093	0.235204	511.517	2.32007	0.0509651	8.40097	0.000315598	0.589675	0.011076	25.2398	0.00193189	2.60963	0.103394	12.5161	0.298088	TLC2.
Carley 2014.	Storaá	ISS.	Zircon	ISS_2.1	Jan. '13.	R33 zircon (419±1 Ma), Black et al. (2004).	0.0121334	18.1508	0.00566299	1.38272			1.234	3.91366	325.087	4.86879	0.274484	8.3426	0.0154536	28.8705	0.0359877	44.9731	0.00237882	7.2119	0.16036	14.0895	0.893778	TLC2.
Carley 2014.	Storaá	ISS.	Zircon	ISS_27.1	Jan. '13.	R33 zircon (419±1 Ma), Black et al. (2004).	7.5235e-12	9999	0.00400946	2.29842			0.551099	0.256635	496.783	2.71027	0.0469951	10.2112	4.61348e-05	0.0861969	0.0130433	10.5647	0.00201295	2.71027	0.25654	12.9521	0.359509	TLC2.
Carley 2014.	Storaá	ISS.	Zircon	ISS_29.1	Jan. '13.	R33 zircon (419±1 Ma), Black et al. (2004).	0.0020465	70.7468	0.00374578	3.85207			0.480046	0.304225	500.734	3.21647	0.0561919	10.5917	0.000669387	1.25069	0.00666553	94.0376	0.00192071	4.27281	0.0454373	12.7004	0.41955	TLC2.
Carley 2014.	Storaá	ISS.	Zircon	ISS_3.1	Jan. '13.	R33 zircon (419±1 Ma), Black et al. (2004).	0.00249179	25.0156	0.00438381	3.05833			1.27599	0.140842	494.192	0.980964	0.0686822	3.59531	0.00151544	2.83146	0.00829685	32.6512	0.0019293	1.56665	0.0479815	12.6626	0.130632	TLC2.
Carley 2014.	Storaá	ISS.	Zircon	ISS_30.1	Jan. '13.	R33 zircon (419±1 Ma), Black et al. (2004).	0.000384894	70.7175	0.00400673	2.8758			1.13527	1.11915	511.987	1.84177	0.0515082	7.60273	0.000352411	0.658459	0.0122513	12.4851	0.00193913	1.91168	0.153117	12.496	0.238282	TLC2.
Carley 2014.	Storaá	ISS.	Zircon	ISS_32.1	Jan. '13.	R33 zircon (419±1 Ma), Black et al. (2004).	0.00485557	27.7687	0.00434982	3.06936			0.864519	0.582516	495.382	3.40516	0.0862767	8.45365	0.00270756	5.05898	0.00289141	212.088	0.0018355	4.38995	0.0206987	12.3429	0.436802	TLC2.
Carley 2014.	Storaá	ISS.	Zircon	ISS_34.1	Jan. '13.	R33 zircon (419±1 Ma), Black et al. (2004).	0.00190053	35.3721	0.00435035	3.12982			1.19534	1.21898	502.204	1.95905	0.0489719	5.19966	0.00018025	0.336779	0.00529012	54.893	0.00192052	2.35241	0.0428545	12.7803	0.253588	TLC2.
Carley 2014.	Storaá	ISS.	Zircon	ISS_37.1	Jan. '13.	R33 zircon (419±1 Ma), Black et al. (2004).	0.00604084	37.8535	0.00371456	4.00091			0.580276	0.264008	440.771	2.73422	0.0536525	9.72312	0.000495092	0.924902	0.0127502	15.6751	0.00201272	5.53736	0.353257	14.4738	0.407011	TLC2.
Carley 2014.	Storaá	ISS.	Zircon	ISS_38.1	Jan. '13.	R33 zircon (419±1 Ma), Black et al. (2004).	0.00369487	30.179	0.00421242	3.85822			1.18554	0.13427	503.121	2.76124	0.0549184	6.00436	0.000583177	1.08962	0.000775308	565.572	0.00185038	3.55425	0.00628434	12.6608	0.353413	TLC2.
Carley 2014.	Storaá	ISS.	Zircon	ISS_39.1	Jan. '13.	R33 zircon (419±1 Ma), Black et al. (2004).	0.00404575	31.6547	0.00371919	3.42793			0.669075	0.169132	490.795	0.722881	0.0489229	6.99211	0.000176547	0.329851	0.0040197	77.8025	0.0018835	2.68745	0.0345419	13.078	0.110214	TLC2.
Carley 2014.	Storaá	ISS.	Zircon	ISS_5.1	Jan. '13.	R33 zircon (419±1 Ma), Black et al. (2004).	0.000951926	70.7275	0.00357097	3.42962			1.22179	1.49399	507.469	1.5535	0.0466737	7.75626	2.47113e-05	0.0461708	0.008639	33.8495	0.00193551	2.01336	0.0594799	12.6847	0.205316	TLC2.
Carley 2014.	Storaá	ISS.	Zircon	ISS_7.1	Jan. '13.	R33 zircon (419±1 Ma), Black et al. (2004).	0.000750546	70.7239	0.00395488	1.44543			0.973653	0.387204	490.963	1.79733	0.045651	11.7712	-4.5137e-05	-0.0843315	0.00952615	28.3758	0.00200825	2.05965	0.0725847	13.1279	0.252073	TLC2.
Carley 2014.	Storaá	ISS.	Zircon	ISS-10.1	Jan. '13.	R33 zircon (419±1 Ma), Black et al. (2004).	0.00731211	50.1217	0.00397107	3.85851	154.452	84.3011	0.501387	0.43083	511.089	6.40513	0.0409349	40.104	-0.000364	-0.680102	0.0197873	38.8548	0.00168929	10.1946	0.262377	12.6864	0.853133	TLC2.
Carley 2014.	Storaá	ISS.	Zircon	ISS-11.1	Jan. '13.	R33 zircon (419±1 Ma), Black et al. (2004).	0.00177717	57.7692	0.00392534	4.86253	480.719	414.289	0.786715	0.54422	509.531	2.1992	0.0389138	11.2347	-0.000500988	-0.936046	0.00301403	147.427	0.00189742	2.96194	0.0200908	12.7575	0.288949	TLC2.
Carley 2014.	Storaá	ISS.	Zircon	ISS-12.1	Jan. '13.	R33 zircon (419±1 Ma), Black et al. (2004).	0.00417568	70.809	0.00366161	4.10709	135.2	68.8229	0.467528	0.460072	538.367	3.63612	0.0534259	18.1075	0.000483132	0.90275	0.00303142	256.289	0.00171254	7.00927	0.0273491	11.855	0.454979	TLC2.
Carley 2014.	Storaá	ISS.	Zircon	ISS-13.1	Jan. '13.	R33 zircon (419±1 Ma), Black et al. (2004).	0.00235294	70.7661	0.00405045	3.07083	228.279	140.339	0.560833	0.338792	483.491	3.73592	0.0487997	14.2262	0.000167939	0.313764	0.00342938	220.886	0.00197737	4.95432	0.0224294	13.2775	0.509294	TLC2.
Carley 2014.	Storaá	ISS.	Zircon	ISS-14.1	Jan. '13.	R33 zircon (419±1 Ma), Black et al. (2004).	1e-32	100	0.00369527	4.57766	110.969	50.0097	0.41641	1.34325	528.855	7.34299	0.0429507	20.5164	-0.000226865	-0.423893	0.0111978	21.7909	0.00189088	7.34299	0.336976	12.2294	0.907627	TLC2.
Carley 2014.	Storaá	ISS.	Zircon	ISS-15.1	Jan. '13.	R33 zircon (419±1 Ma), Black et al. (2004).	0.00220322	50.0367	0.00393446	2.0997	520.668	495.867	0.878924	1.08604	503.185	2.47531	0.0532583	9.21825	0.000470703	0.879467	0.00515803	93.1683	0.00190553	3.27749	0.0351782	12.6861	0.323713	TLC2.
Carley 2014.	Storaá	ISS.	Zircon	ISS-16.1	Jan. '13.	R33 zircon (419±1 Ma), Black et al. (2004).	0.00083251	70.7303	0.00392775	6.23869	697.066	716.835	0.940004	0.165581	492.294	4.24086	0.0452365	8.46964	-7.31794e-05	-0.136725	0.00902549	30.2257	0.00199971	4.38564	0.145096	13.0992	0.55874	TLC2.
Carley 2014.	Storaá	ISS.	Zircon	ISS-17.1	Jan. '13.	R33 zircon (419±1 Ma), Black et al. (2004).	0.0277144	23.787	0.00609058	3.54075	117.724	67.4792	0.526476	0.48864	318.344	3.80967	0.39934	6.49009	0.0239129	44.6845	0.0146455	245.3	0.00151446	25.8339	0.105316	11.1916	0.788348	TLC2.
Carley 2014.	Storaá	ISS.	Zircon	ISS-18.1	Jan. '13.	R33 zircon (419±1 Ma), Black et al. (2004).	-1.47065e-19	9999	0.0040889	3.47592	187.187	103.158	0.503447	0.399351	466.523	2.55888	0.0348189	18.6118	-0.000779996	-1.4572	0.0102907	18.7869	0.00214352	2.55888	0.136205	14.0041	0.375521	TLC2.
Carley 2014.	Storaá	ISS.	Zircon	ISS-19.1	Jan. '13.	R33 zircon (419±1 Ma), Black et al. (2004).	0.00111464	100.037	0.00427856	2.99772	240.452	273.134	1.04606	0.270713	504.739	4.27499	0.053889	13.5088	0.000513485	0.959405	0.00996203	50.0612	0.00193996	4.77522	0.0953875	12.6368	0.552494	TLC2.
Carley 2014.	Storaá	ISS.	Zircon	ISS-2.1	Jan. '13.	R33 zircon (419±1 Ma), Black et al. (2004).	0.004403	40.8847	0.00409564	2.42432	350.067	250.955	0.66063	0.249891	513.742	1.95798	0.0444236	11.9137	-0.000127539	-0.238298	0.00654626	37.1868	0.00178637	4.1552	0.111738	12.5656	0.25979	TLC2.
Carley 2014.	Storaá	ISS.	Zircon	ISS-20.1	Jan. '13.	R33 zircon (419±1 Ma), Black et al. (2004).	-1.48044e-19	9999	0.00383661	3.80949	153.601	95.6259	0.570434	0.407291	494.291	2.06258	0.0443037	19.4226	-0.00013631	-0.254675	0.0123583	19.5318	0.0020231	2.06258	0.105601	13.0617	0.30427	TLC2.
Carley 2014.	Storaá	ISS.	Zircon	ISS-21.1	Jan. '13.	R33 zircon (419±1 Ma), Black et al. (2004).	0.000470467	100.016	0.00391045	6.41695	593.101	742.539	1.15146	0.582932	510.261	3.61269	0.0572702	8.22276	0.000742747	1.38778	0.0134883	17.1622	0.00194255	3.71998	0.216754	12.4462	0.455589	TLC2.
Carley 2014.	Storaá	ISS.	Zircon	ISS-22.1	Jan. '13.	R33 zircon (419±1 Ma), Black et al. (2004).	0.0103422	33.448	0.00496765	3.02641	208.234	179.021	0.806703	2.26826	439.142	2.02547	0.153043	8.14078	0.00722944	13.5076	0.00269881	572.782	0.00183714	8.26346	0.0144269	12.6842	0.345413	TLC2.
Carley 2014.	Storaá	ISS.	Zircon	ISS-23.1	Jan. '13.	R33 zircon (419±1 Ma), Black et al. (2004).	0.00185431	57.7707	0.0042284	2.22428	398.315	343.224	0.788275	0.222844	472.105	1.9486	0.0694457	8.53324	0.00156642	2.92659	0.0118178	42.0387	0.00204479	2.84525	0.0676817	13.2414	0.277364	TLC2.
Carley 2014.	Storaá	ISS.	Zircon	ISS-24.1	Jan. '13.	R33 zircon (419±1 Ma), Black et al. (2004).	1e-32	100	0.00385646	4.65037	95.4253	46.2852	0.442255	0.551142	500.328	3.28596	0.0761076	18.1013	0.00201873	3.77191	0.0209737	18.3971	0.00199869	3.28596	0.178613	12.3865	0.464479	TLC2.
Carley 2014.	Storaá	ISS.	Zircon	ISS-26.1	Jan. '13.	R33 zircon (419±1 Ma), Black et al. (2004).	-2.87328e-19	9999	0.00362485	7.48246	153.876	94.2812	0.558547	0.390596	510.914	4.6975	0.0426598	18.1107	-0.000247137	-0.461755	0.0115126	18.71	0.00195728	4.6975	0.251069	12.6632	0.60708	TLC2.
Carley 2014.	Storaá	ISS.	Zircon	ISS-27.1	Jan. '13.	R33 zircon (419±1 Ma), Black et al. (2004).	0.0100878	50.1678	0.00444182	4.48714	102.389	51.1287	0.453597	0.561397	441.964	3.11334	0.060542	18.3456	0.00096197	1.79712	0.0302987	34.7731	0.00183622	12.0588	0.346785	14.3078	0.48989	TLC2.
Carley 2014.	Storaá	ISS.	Zircon	ISS-28.1	Jan. '13.	R33 zircon (419±1 Ma), Black et al. (2004).	0.00117575	100.039	0.00360166	3.0903	250.824	164.497	0.599212	0.314533	544.101	2.56237	0.0446308	15.5856	-0.000112586	-0.210371	0.0066532	72.8458	0.00179752	3.40815	0.0467858	11.8618	0.321109	TLC2.
Carley 2014.	Storaá	ISS.	Zircon	ISS-29.1	Jan. '13.	R33 zircon (419±1 Ma), Black et al. (2004).	1e-32	100	0.00373594	4.82707	105.041	49.7914	0.4348	0.551463	542.751	4.24779	0.0658409	18.8143	0.00132437	2.4747	0.0167262	19.2879	0.00184246	4.24779	0.220231	11.573	0.525298	TLC2.
Carley 2014.	Storaá	ISS.	Zircon	ISS-3.1	Jan. '13.	R33 zircon (419±1 Ma), Black et al. (2004).	0.00231555	40.8563	0.00390925	1.76357	721.303	968.81	1.23481	0.96353	487.965	3.48937	0.0760495	13.6204	0.0020144	3.76372	0.0112628	43.9692	0.00196066	3.9483	0.0897969	12.7011	0.475437	TLC2.
Carley 2014.	Storaá	ISS.	Zircon	ISS-30.1	Jan. '13.	R33 zircon (419±1 Ma), Black et al. (2004).	0.00141568	57.7623	0.00421183	1.94163	565.88	668.124	1.08734	0.479129	486.637	3.31716	0.042668	9.41551	-0.000247407	-0.462234	0.00582028	63.8265	0.00200057	3.66963	0.0574938	13.2944	0.445782	TLC2.
Carley 2014.	Storaá	ISS.	Zircon	ISS-31.1	Jan. '13.	R33 zircon (419±1 Ma), Black et al. (2004).	0.00613079	70.855	0.00385799	13.3828	87.0581	37.1182	0.391226	0.614328	509.344	11.5443	0.0510899	20.5045	0.000323984	0.605342	0.0121082	27.6883	0.00173841	14.7409	0.532386	12.5674	1.4595	TLC2.
Carley 2014.	Storaá	ISS.	Zircon	ISS-32.1	Jan. '13.	R33 zircon (419±1 Ma), Black et al. (2004).	0.00135226	70.7425	0.00380618	7.08207	450.935	539.322	1.07455	3.16853	521.474	5.06723	0.0472059	10.8838	6.12152e-05	0.114378	0.00689335	59.1537	0.00186919	5.38883	0.0910988	12.3359	0.629815	TLC2.
Carley 2014.	Storaá	ISS.	Zircon	ISS-34.1	Jan. '13.	R33 zircon (419±1 Ma), Black et al. (2004).	0.000387458	100.013	0.00406691	1.75904	702.346	1035.67	1.35235	0.146859	493.484	2.24042	0.0501138	7.98686	0.000257324	0.480776	0.0123099	16.0476	0.00201174	2.35613	0.146821	12.9872	0.298175	TLC2.
Carley 2014.	Storaá	ISS.	Zircon	ISS-35.1	Jan. '13.	R33 zircon (419±1 Ma), Black et al. (2004).	0.00115237	70.7378	0.00423442	5.68578	466.006	484.898	0.933876	3.86287	496.026	2.26724	0.0536713	22.9765	0.000498449	0.931294	0.00991262	48.6923	0.00197262	2.75013	0.0564797	12.8622	0.354855	TLC2.
Carley 2014.	Storaá	ISS.	Zircon	ISS-36.1	Jan. '13.	R33 zircon (419±1 Ma), Black et al. (2004).	0.0115486	19.1994	0.0047727	1.60403	564.95	796.002	1.24059	3.7315	329.753	3.52875	0.31384	9.4637	0.0181204	33.8558	0.0557561	31.0672	0.00237823	6.35267	0.204481	12.9177	0.86348	TLC2.
Carley 2014.	Storaá	ISS.	Zircon	ISS-37.1	Jan. '13.	R33 zircon (419±1 Ma), Black et al. (2004).	0.00119572	70.7389	0.00467456	2.19602	411.084	408.501	0.917732	0.213834	475.263	3.53637	0.0409288	11.2126	-0.000365667	-0.683163	0.00645237	61.5165	0.00205709	3.88825	0.0632067	13.6421	0.488456	TLC2.
Carley 2014.	Storaá	ISS.	Zircon	ISS-38.1	Jan. '13.	R33 zircon (419±1 Ma), Black et al. (2004).	0.00388544	50.0647	0.00402974	2.77667	284.496	238.54	0.773567	0.857807	497.267	3.25175	0.043444	14.1084	-0.000194458	-0.363319	0.00479186	80.3068	0.001865	5.09231	0.0634107	12.9977	0.434125	TLC2.
Carley 2014.	Storaá	ISS.	Zircon	ISS-39.1	Jan. '13.	R33 zircon (419±1 Ma), Black et al. (2004).	0.00188205	70.755	0.00371199	2.75238	301.995	198.962	0.600212	0.283457	509.053	2.38888	0.0422425	13.5693	-0.000275469	-0.514689	0.00347445	165.84	0.00189535	3.51521	0.0211964	12.7162	0.31712	TLC2.
Carley 2014.	Storaá	ISS.	Zircon	ISS-4.1	Jan. '13.	R33 zircon (419±1 Ma), Black et al. (2004).	0.0160692	21.5982	0.00535227	7.54844	282.336	204.909	0.664951	0.290919	372.057	5.63273	0.286917	5.11779	0.0162977	30.4524	0.0132558	148.576	0.00188075	10.8451	0.0729937	12.0388	0.750067	TLC2.
Carley 2014.	Storaá	ISS.	Zircon	ISS-40.1	Jan. '13.	R33 zircon (419±1 Ma), Black et al. (2004).	0.00453857	57.8223	0.00443535	3.47082	150.345	81.6602	0.495407	0.422985	413.285	2.05644	0.17291	8.84221	0.00857466	16.0205	0.0340215	38.3816	0.00221446	5.73854	0.149513	13.0858	0.403838	TLC2.
Carley 2014.	Storaá	ISS.	Zircon	ISS-41.1	Jan. '13.	R33 zircon (419±1 Ma), Black et al. (2004).	0.00487804	50.0812	0.00450174	3.11765	196.282	131.684	0.612805	0.349416	454.043	3.97446	0.0973131	10.279	0.00345395	6.4531	0.00639953	182.553	0.00200171	6.40441	0.0350825	13.2679	0.556661	TLC2.
Carley 2014.	Storaá	ISS.	Zircon	ISS-42.1	Jan. '13.	R33 zircon (419±1 Ma), Black et al. (2004).	0.00407608	50.0679	0.00367713	2.85418	287.115	191.51	0.607057	0.293181	514.553	4.93762	0.0522747	12.6221	0.000404424	0.755646	0.00306302	184.169	0.00179542	6.43556	0.0349437	12.4215	0.621759	TLC2.
Carley 2014.	Storaá	ISS.	Zircon	ISS-43	Jan. '13.	R33 zircon (419±1 Ma), Black et al. (2004).	0.0180385	44.9895	0.00501995	5.33805	72.3871	37.6469	0.478025	0.681945	405.258	2.31539	0.149817	14.3233	0.00700966	13.0957	0.0449462	32.7969	0.00163599	22.9851	0.70083	13.809	0.536645	TLC2.
Carley 2014.	Storaá	ISS.	Zircon	ISS-45.1	Jan. '13.	R33 zircon (419±1 Ma), Black et al. (2004).	-0.000963802	100.032	0.00416765	2.77902	276.508	245.995	0.813712	0.272945	478.5	2.36641	0.0533459	12.6104	0.00047579	0.888925	0.0197121	22.7108	0.0021275	2.95477	0.130104	13.3386	0.335557	TLC2.
Carley 2014.	Storaá	ISS.	Zircon	ISS-46.1	Jan. '13.	R33 zircon (419±1 Ma), Black et al. (2004).	0.0438716	6.70218	0.0172178	2.64991	472.205	564.696	1.10836	0.577319	126.804	3.89383	0.628579	1.7632	0.0394387	73.6836	0.0620791	51.5892	0.00142222	30.7092	0.595264	13.3648	0.881512	TLC2.
Carley 2014.	Storaá	ISS.	Zircon	ISS-47.1	Jan. '13.	R33 zircon (419±1 Ma), Black et al. (2004).	-0.00049688	100.017	0.00374918	5.98553	555.357	444.664	0.722541	1.55497	497.426	2.84116	0.0484442	9.23799	0.000144339	0.269681	0.0155807	15.4488	0.00202901	2.9864	0.19331	12.9117	0.37384	TLC2.
Carley 2014.	Storaá	ISS.	Zircon	ISS-48.1	Jan. '13.	R33 zircon (419±1 Ma), Black et al. (2004).	-1.52789e-19	9999	0.00349723	2.99612	257.155	172.868	0.61048	0.304615	504.822	2.46191	0.0696391	31.9177	0.00158061	2.9533	0.0190202	32.0125	0.0019809	2.46191	0.0769046	12.3807	0.470525	TLC2.
Carley 2014.	Storaá	ISS.	Zircon	ISS-5.1	Jan. '13.	R33 zircon (419±1 Ma), Black et al. (2004).	0.00102494	100.034	0.00383281	2.86455	263.736	359.473	1.25129	0.743456	498.831	1.98486	0.0548933	12.6467	0.000581339	1.08617	0.0107451	43.2274	0.0019663	2.78462	0.0644178	12.77	0.277499	TLC2.
Carley 2014.	Storaá	ISS.	Zircon	ISS-7.1	Jan. '13.	R33 zircon (419±1 Ma), Black et al. (2004).	0.00450958	50.0751	0.00378327	3.01895	261.094	223.533	0.789413	0.656686	540.173	2.45948	0.0427012	15.3368	-0.000243433	-0.45486	0.00709081	32.8614	0.00169527	5.22302	0.158941	11.9771	0.310511	TLC2.
Carley 2014.	Storaá	ISS.	Zircon	ISS-8.1	Jan. '13.	R33 zircon (419±1 Ma), Black et al. (2004).	-7.2361e-20	9999	0.00443236	1.86132	600.391	723.099	1.10638	0.171206	462.145	2.20424	0.0375933	9.67952	-0.000592182	-1.10631	0.0112159	9.92733	0.00216382	2.20424	0.222038	14.0878	0.316851	TLC2.
Carley 2014.	Storaá	ISS.	Zircon	ISS-9.1	Jan. '13.	R33 zircon (419±1 Ma), Black et al. (2004).	-9.16137e-19	9999	0.00427265	7.08582	43.6691	25.0754	0.528006	0.794599	464.94	9.23775	0.0380084	33.0551	-0.000563942	-1.05356	0.0112716	34.3217	0.00215081	9.23775	0.269152	13.9959	1.31055	TLC2.
Carley 2014.	Storaá	ISS.	Zircon	ISS_X-1.1	Jan. '13.	R33 zircon (419±1 Ma), Black et al. (2004).	0.00332171	57.7989	0.0039433	2.98392	287.576	221.418	0.676041	0.302855	498.488	4.3986	0.0489312	13.8795	0.000177368	0.331391	0.000825391	914.9	0.00188156	5.82876	0.00637092	12.8762	0.576759	TLC3.
Carley 2014.	Storaá	ISS.	Zircon	ISS_X-1.2	Jan. '13.	R33 zircon (419±1 Ma), Black et al. (2004).	0.00626304	70.8581	0.00447145	5.00986	113.63	59.9607	0.466413	0.61599	459.31	1.70467	0.0630944	18.7552	0.00113561	2.1216	0.0104439	59.8043	0.00192243	9.54326	0.159575	13.7226	0.314094	TLC3.
Carley 2014.	Storaá	ISS.	Zircon	ISS-10.1	Jan. '13.	R33 zircon (419±1 Ma), Black et al. (2004).	0.00472854	70.822	0.00410541	4.40245	102.324	48.3735	0.414994	0.554904	457.182	1.55487	0.0455341	19.0241	-5.43243e-05	-0.101488	0.00855549	47.722	0.00199409	7.03648	0.147448	14.0992	0.267935	TLC3.
Carley 2014.	Storaá	ISS.	Zircon	ISS-11.1	Jan. '13.	R33 zircon (419±1 Ma), Black et al. (2004).	0.00366847	57.8056	0.00370439	3.1531	232.258	158.524	0.599264	0.326918	527.955	1.28327	0.0529703	13.8227	0.000451963	0.844493	0.00113989	661.118	0.00176427	4.44324	0.00672081	12.0957	0.191895	TLC3.
Carley 2014.	Storaá	ISS.	Zircon	ISS-12.1	Jan. '13.	R33 zircon (419±1 Ma), Black et al. (2004).	0.00118525	100.04	0.00396554	3.06136	231.877	153.742	0.582805	0.332914	484.31	2.64911	0.0370075	16.2748	-0.000631021	-1.17893	0.00526206	103.331	0.00201907	3.48568	0.0337332	13.4534	0.37026	TLC3.
Carley 2014.	Storaá	ISS.	Zircon	ISS-13.1	Jan. '13.	R33 zircon (419±1 Ma), Black et al. (2004).	0.00243024	70.7679	0.00411853	3.11164	221.492	136.778	0.542563	0.352059	458.549	2.54424	0.0438492	15.4376	-0.000168435	-0.31467	0.00176413	469.204	0.00208178	4.21921	0.00899229	14.0871	0.377775	TLC3.
Carley 2014.	Storaá	ISS.	Zircon	ISS-15.1	Jan. '13.	R33 zircon (419±1 Ma), Black et al. (2004).	0.00203804	57.7742	0.00413163	2.32782	402.941	356.195	0.785964	1.71958	485.233	3.01159	0.0396614	11.6192	-0.00045117	-0.842924	0.00221889	240.753	0.0019824	3.7815	0.015707	13.3833	0.410122	TLC3.
Carley 2014.	Storaá	ISS.	Zircon	ISS-16.1	Jan. '13.	R33 zircon (419±1 Ma), Black et al. (2004).	0.00152922	100.051	0.00386692	3.50258	179.777	108.732	0.533022	0.379797	501.033	3.67243	0.0602113	14.5666	0.000941728	1.75954	0.00999245	67.554	0.00193885	4.70602	0.0696631	12.6275	0.48486	TLC3.
Carley 2014.	Storaá	ISS.	Zircon	ISS-18.1	Jan. '13.	R33 zircon (419±1 Ma), Black et al. (2004).	0.0136318	33.4845	0.00432826	3.51606	157.702	89.568	0.501096	0.901138	447.016	4.17849	0.0787887	12.7598	0.00219854	4.1074	0.0414126	29.0401	0.00166734	12.1806	0.41944	13.8139	0.605162	TLC3.
Carley 2014.	Storaá	ISS.	Zircon	ISS-19.1	Jan. '13.	R33 zircon (419±1 Ma), Black et al. (2004).	-0.00235684	100.079	0.00368787	4.3749	120.66	67.1393	0.49187	0.47952	536.426	3.50759	0.0438198	19.3463	-0.000167754	-0.313449	0.0207312	43.1461	0.00194629	5.48844	0.127206	12.0438	0.441366	TLC3.
Carley 2014.	Storaá	ISS.	Zircon	ISS-2.1	Jan. '13.	R33 zircon (419±1 Ma), Black et al. (2004).	-0.00129131	100.043	0.00366098	3.2312	222.727	147.472	0.578869	0.336963	522.715	1.29024	0.0508733	14.9583	0.000309725	0.578714	0.0187427	28.3013	0.00195925	2.68699	0.0949424	12.2495	0.197505	TLC3.
Carley 2014.	Storaá	ISS.	Zircon	ISS-20.1	Jan. '13.	R33 zircon (419±1 Ma), Black et al. (2004).	0.00200356	100.067	0.00395507	4.03279	130.537	72.4669	0.48709	0.459345	473.344	5.99134	0.0468158	18.4558	3.31485e-05	0.0619305	0.00451559	206.05	0.00203355	7.14415	0.0346719	13.5961	0.827459	TLC3.
Carley 2014.	Storaá	ISS.	Zircon	ISS-20.1…dup1	Jan. '13.	R33 zircon (419±1 Ma), Black et al. (2004).	0.0022804	100.076	0.00309	4.2459	112.084	62.5393	0.481205	0.453454	512.429	1.41994	0.0476226	19.6509	8.91586e-05	0.166587	0.00322398	303.487	0.00186834	4.67466	0.0154032	12.5469	0.231999	TLC3.
Carley 2014.	Storaá	ISS.	Zircon	ISS-21.1	Jan. '13.	R33 zircon (419±1 Ma), Black et al. (2004).	1e-32	100	0.003696	5.76275	68.3863	47.4238	0.605709	0.595915	496.462	1.76388	0.057377	22.4391	0.000749543	1.40044	0.0159351	22.5083	0.00201425	1.76388	0.0783658	12.7902	0.308931	TLC3.
Carley 2014.	Storaá	ISS.	Zircon	ISS-21.1…dup1	Jan. '13.	R33 zircon (419±1 Ma), Black et al. (2004).	1e-32	100	0.00322973	5.86041	68.8839	48.1889	0.607618	0.579573	473.636	4.32178	0.0390912	28.2719	-0.000490239	-0.915891	0.0113798	28.6003	0.00211133	4.32178	0.15111	13.7205	0.622259	TLC3.
Carley 2014.	Storaá	ISS.	Zircon	ISS-22.1	Jan. '13.	R33 zircon (419±1 Ma), Black et al. (2004).	0.00276455	70.7758	0.00403207	6.67425	198.191	110.266	0.488693	0.379895	476.323	5.97815	0.0467418	15.614	2.82464e-05	0.0527724	0.00102315	885.753	0.00199098	7.11312	0.0080306	13.5124	0.816797	TLC3.
Carley 2014.	Storaá	ISS.	Zircon	ISS-23.1	Jan. '13.	R33 zircon (419±1 Ma), Black et al. (2004).	1.42751e-11	9999	0.00423478	3.39759	180.223	115.049	0.562667	0.381759	462.545	1.36209	0.0557896	14.9135	0.00064078	1.19714	0.0166303	14.9756	0.00216195	1.36209	0.090954	13.7553	0.237712	TLC3.
Carley 2014.	Storaá	ISS.	Zircon	ISS-3.1	Jan. '13.	R33 zircon (419±1 Ma), Black et al. (2004).	0.00604116	57.8512	0.00355196	4.02822	141.469	83.2128	0.515412	0.431632	512.926	1.41815	0.0445767	19.2301	-0.00011719	-0.21896	0.0133979	23.097	0.00172954	7.49615	0.324551	12.5831	0.224342	TLC3.
Carley 2014.	Storaá	ISS.	Zircon	ISS-4.1	Jan. '13.	R33 zircon (419±1 Ma), Black et al. (2004).	-1.71644e-19	9999	0.00391805	3.75476	155.403	86.827	0.490653	0.423582	497.929	4.77158	0.0363196	18.3331	-0.000677149	-1.26515	0.0100571	18.9439	0.00200832	4.77158	0.251879	13.0969	0.63392	TLC3.
Carley 2014.	Storaá	ISS.	Zircon	ISS-6.1	Jan. '13.	R33 zircon (419±1 Ma), Black et al. (2004).	-2.40577e-11	9999	0.00388711	4.45425	113.627	57.732	0.444472	0.516944	492.33	6.20606	0.038225	20.8715	-0.000548239	-1.02429	0.0107051	21.7746	0.00203116	6.20606	0.285013	13.2142	0.830065	TLC3.
Carley 2014.	Storaá	ISS.	Zircon	ISS-7.1	Jan. '13.	R33 zircon (419±1 Ma), Black et al. (2004).	0.00595238	57.8495	0.00388236	3.99776	137.682	78.5289	0.502122	0.441993	503.639	7.65773	0.0419684	21.3143	-0.000294219	-0.549714	0.0139791	26.9373	0.00176473	10.5375	0.391186	12.8572	0.994473	TLC3.
Carley 2014.	Storaá	ISS.	Zircon	ISS-8.1	Jan. '13.	R33 zircon (419±1 Ma), Black et al. (2004).	0.00238095	57.7808	0.00329527	5.22598	347.342	315.283	0.795222	0.83118	528.096	3.11787	0.0443841	12.5476	-0.000129772	-0.242477	0.0018725	307.119	0.00180935	4.11805	0.0134087	12.2249	0.390474	TLC3.
Carley 2014.	Storaá	ISS.	Zircon	ISS-9.1	Jan. '13.	R33 zircon (419±1 Ma), Black et al. (2004).	0.0016148	57.7661	0.00423702	2.07069	478.966	386.78	0.710101	0.215698	454.231	1.15047	0.0413535	10.4922	-0.000337715	-0.63091	0.00489193	92.6872	0.00213511	2.1336	0.0230193	14.2657	0.181506	TLC3.
Carley 2014.	Krossá-Kækjudalsá	ISKK.	Zircon	ISKK_1.1	Jan. '13.	R33 zircon (419±1 Ma), Black et al. (2004).	0.000522602	100.013	0.00367577	3.5453			0.781671	0.906379	544.978	2.87254	0.0453505	8.18819	-6.38025e-05	-0.119218	0.00940725	23.4364	0.00181702	3.03714	0.129591	11.832	0.34417	TLC2.
Carley 2014.	Krossá-Kækjudalsá	ISKK.	Zircon	ISKK_13.1	Jan. '13.	R33 zircon (419±1 Ma), Black et al. (2004).	0.000247497	57.7386	0.00367307	3.58621			1.22682	0.789044	498.011	1.14519	0.0474346	3.09281	7.59531e-05	0.141909	0.0120619	6.02703	0.0019987	1.17619	0.195152	12.913	0.149712	TLC2.
Carley 2014.	Krossá-Kækjudalsá	ISKK.	Zircon	ISKK_14.1	Jan. '13.	R33 zircon (419±1 Ma), Black et al. (2004).	0.00125602	44.7354	0.00293891	6.80551			0.834249	1.97209	482.493	1.88037	0.0636851	8.37258	0.00117647	2.19806	0.0125893	22.513	0.00202393	2.16598	0.0962104	13.0537	0.261278	TLC2.
Carley 2014.	Krossá-Kækjudalsá	ISKK.	Zircon	ISKK_15.1	Jan. '13.	R33 zircon (419±1 Ma), Black et al. (2004).	-2.49898e-19	9999	0.00347177	5.44869			0.489989	0.286479	490.388	4.03273	0.0448202	10.6575	-0.000101451	-0.189545	0.0126019	11.395	0.0020392	4.03273	0.353904	13.157	0.536118	TLC2.
Carley 2014.	Krossá-Kækjudalsá	ISKK.	Zircon	ISKK_18.1	Jan. '13.	R33 zircon (419±1 Ma), Black et al. (2004).	4.06788e-12	9999	0.0040112	3.48825			0.769076	1.00224	535.895	1.7211	0.0449645	7.23186	-9.02149e-05	-0.168567	0.0115689	7.43384	0.00186604	1.7211	0.231522	12.0383	0.212876	TLC2.
Carley 2014.	Krossá-Kækjudalsá	ISKK.	Zircon	ISKK_20.1	Jan. '13.	R33 zircon (419±1 Ma), Black et al. (2004).	0.000406273	70.7179	0.00384518	2.82119			1.1654	0.101711	501.273	1.57324	0.0476893	4.92756	9.3318e-05	0.174354	0.0113709	11.8999	0.00197978	1.66363	0.139802	12.8249	0.205212	TLC2.
Carley 2014.	Krossá-Kækjudalsá	ISKK.	Zircon	ISKK_21.1	Jan. '13.	R33 zircon (419±1 Ma), Black et al. (2004).	0.00428306	44.7692	0.00357325	2.18698			0.550674	1.16001	493.214	0.928692	0.0438151	10.4212	-0.00016945	-0.316591	0.00646472	41.3944	0.00186527	4.00337	0.0967128	13.0983	0.143041	TLC2.
Carley 2014.	Krossá-Kækjudalsá	ISKK.	Zircon	ISKK_24.1	Jan. '13.	R33 zircon (419±1 Ma), Black et al. (2004).	-1.22809e-19	9999	0.00397319	3.36065			0.833544	0.456214	495.72	1.38299	0.0447571	7.03481	-0.000105543	-0.197192	0.0124488	7.16946	0.00201727	1.38299	0.192901	13.0166	0.187184	TLC2.
Carley 2014.	Krossá-Kækjudalsá	ISKK.	Zircon	ISKK_25.1	Jan. '13.	R33 zircon (419±1 Ma), Black et al. (2004).	-9.74816e-12	9999	0.00380854	4.45131			0.461916	0.305223	488.473	2.95206	0.0757401	8.68041	0.00199346	3.72459	0.021379	9.16865	0.0020472	2.95206	0.321973	12.693	0.390169	TLC2.
Carley 2014.	Krossá-Kækjudalsá	ISKK.	Zircon	ISKK_3.1	Jan. '13.	R33 zircon (419±1 Ma), Black et al. (2004).	-0.00100604	100.025	0.00354999	6.50851			0.473342	0.301104	475.314	4.1208	0.0361504	13.0451	-0.000689437	-1.28804	0.0150476	30.2283	0.00214342	4.51511	0.149367	13.7225	0.570812	TLC2.
Carley 2014.	Krossá-Kækjudalsá	ISKK.	Zircon	ISKK_5.1	Jan. '13.	R33 zircon (419±1 Ma), Black et al. (2004).	0.00466562	28.9012	0.00463098	3.05804			1.03269	1.24244	509.287	2.95968	0.118678	4.40048	0.00490316	9.16202	0.0123881	44.9583	0.00179235	4.04709	0.0900187	11.4878	0.349912	TLC2.
Carley 2014.	Krossá-Kækjudalsá	ISKK.	Zircon	ISKK_54.1	Jan. '13.	R33 zircon (419±1 Ma), Black et al. (2004).	-0.000658575	70.7223	0.00344584	3.70405			0.587143	0.700602	492.568	1.81847	0.0421052	10.6482	-0.000285332	-0.533098	0.0146673	15.7199	0.00205515	2.01141	0.127953	13.1437	0.250086	TLC2.
Carley 2014.	Krossá-Kækjudalsá	ISKK.	Zircon	ISKK_61.1	Jan. '13.	R33 zircon (419±1 Ma), Black et al. (2004).	0.00171401	57.7598	0.00372375	6.36506			0.531474	0.527326	497.99	3.39017	0.0573536	7.9047	0.000748008	1.39758	0.00846268	51.0686	0.00194377	3.89164	0.0762043	12.7513	0.438315	TLC2.
Carley 2014.	Krossá-Kækjudalsá	ISKK.	Zircon	ISKK_65.1	Jan. '13.	R33 zircon (419±1 Ma), Black et al. (2004).	0.0073131	40.8994	0.00526988	6.38867			0.640698	0.780963	382.722	5.20934	0.206962	6.3343	0.0108807	20.3285	0.0333835	46.9357	0.00225586	8.30843	0.177017	13.4056	0.75153	TLC2.
Carley 2014.	Krossá-Kækjudalsá	ISKK.	Zircon	ISKK_67.1	Jan. '13.	R33 zircon (419±1 Ma), Black et al. (2004).	0.00140094	70.7354	0.00321372	6.34628			0.542238	0.230174	503.147	2.41061	0.0567269	8.77525	0.000705711	1.31856	0.00954504	45.0039	0.00193547	3.07017	0.0682202	12.6309	0.314765	TLC2.
Carley 2014.	Krossá-Kækjudalsá	ISKK.	Zircon	ISKK_70.1	Jan. '13.	R33 zircon (419±1 Ma), Black et al. (2004).	0.000675084	70.7226	0.00365473	3.00552			0.8501	0.391753	498.287	1.85372	0.048635	6.12069	0.000157293	0.293882	0.0105382	20.3632	0.00198156	2.06215	0.101269	12.8863	0.243619	TLC2.
Carley 2014.	Krossá-Kækjudalsá	ISKK.	Zircon	ISKK_8.1	Jan. '13.	R33 zircon (419±1 Ma), Black et al. (2004).	0.00121668	50.0152	0.00367668	3.71167			0.69751	0.260131	504.172	0.692199	0.0644892	5.34485	0.00123167	2.3013	0.012436	21.1991	0.00193836	1.35379	0.0638605	12.4798	0.102729	TLC2.
Carley 2014.	Krossá-Kækjudalsá	ISKK.	Zircon	ISKK-1.1	Jan. '13.	R33 zircon (419±1 Ma), Black et al. (2004).	-0.00286047	70.7781	0.00415025	3.40445	192.088	145.627	0.703169	1.41278	499.015	3.75334	0.0555278	14.7549	0.000624331	1.1665	0.0276952	29.6065	0.00211105	5.19438	0.175448	12.755	0.49675	TLC2.
Carley 2014.	Krossá-Kækjudalsá	ISKK.	Zircon	ISKK-10.1	Jan. '13.	R33 zircon (419±1 Ma), Black et al. (2004).	1e-32	100	0.00396346	4.39302	119.021	60.6988	0.464483	0.517968	482.39	2.1327	0.041419	20.1869	-0.000332186	-0.620622	0.0118387	20.2993	0.00207301	2.1327	0.105063	13.4324	0.319176	TLC2.
Carley 2014.	Krossá-Kækjudalsá	ISKK.	Zircon	ISKK-11.1	Jan. '13.	R33 zircon (419±1 Ma), Black et al. (2004).	0.0090713	15.7668	0.00619206	6.18127	1259.66	1081.78	0.790149	0.546962	358.821	2.62861	0.265589	32.1338	0.0148522	27.7495	0.0475763	70.6306	0.00231457	4.15481	0.0588245	12.9672	1.96678	TLC2.
Carley 2014.	Krossá-Kækjudalsá	ISKK.	Zircon	ISKK-12.1	Jan. '13.	R33 zircon (419±1 Ma), Black et al. (2004).	0.00267088	50.0445	0.00402721	5.52076	464.381	377.701	0.738937	1.27522	497.73	4.70487	0.0502379	10.4286	0.00026588	0.496766	0.00235313	251.052	0.00190886	5.38932	0.0214669	12.8744	0.61135	TLC2.
Carley 2014.	Krossá-Kækjudalsá	ISKK.	Zircon	ISKK-13.1	Jan. '13.	R33 zircon (419±1 Ma), Black et al. (2004).	0.0017339	50.0289	0.00409337	1.86382	697.254	320.409	0.423165	0.226239	521.214	1.9252	0.0479171	8.608	0.000109391	0.204392	0.00550707	66.52	0.00185644	2.55191	0.038363	12.331	0.245841	TLC2.
Carley 2014.	Krossá-Kækjudalsá	ISKK.	Zircon	ISKK-14.1	Jan. '13.	R33 zircon (419±1 Ma), Black et al. (2004).	0.000526759	70.7231	0.00482241	4.76996	1084.92	1250.3	1.07391	0.779151	485.137	2.55436	0.0499727	6.56018	0.000247473	0.462361	0.0118628	15.6261	0.00204099	2.64932	0.169545	13.2128	0.341726	TLC2.
Carley 2014.	Krossá-Kækjudalsá	ISKK.	Zircon	ISKK-15.1	Jan. '13.	R33 zircon (419±1 Ma), Black et al. (2004).	0.00898352	50.1495	0.00410623	4.32533	139.463	70.6539	0.465247	0.503654	506.307	4.62142	0.0422558	19.2173	-0.000274656	-0.513166	0.0267283	41.0829	0.00164357	11.121	0.270697	12.7849	0.604718	TLC2.
Carley 2014.	Krossá-Kækjudalsá	ISKK.	Zircon	ISKK-16.1	Jan. '13.	R33 zircon (419±1 Ma), Black et al. (2004).	0.00348792	100.116	0.00472631	5.27221	70.8941	42.8735	0.555467	0.621008	424.269	2.28778	0.0616199	20.0153	0.00103425	1.93206	0.00230978	780.467	0.00220342	7.34341	0.00940899	14.8834	0.414447	TLC2.
Carley 2014.	Krossá-Kækjudalsá	ISKK.	Zircon	ISKK-17.1	Jan. '13.	R33 zircon (419±1 Ma), Black et al. (2004).	0.00271084	100.09	0.00388014	4.63959	108.096	53.0189	0.448126	0.546001	473.203	2.15359	0.0502008	19.4441	0.000262497	0.490418	0.00228232	550.369	0.00200623	5.75756	0.0104613	13.5419	0.336372	TLC2.
Carley 2014.	Krossá-Kækjudalsá	ISKK.	Zircon	ISKK-18.1	Jan. '13.	R33 zircon (419±1 Ma), Black et al. (2004).	1e-32	100	0.00433015	3.13833	248.668	197.42	0.739195	1.20484	517.706	3.30702	0.0593423	12.9942	0.000883372	1.65056	0.0158046	13.4084	0.0019316	3.30702	0.246637	12.2347	0.422151	TLC2.
Carley 2014.	Krossá-Kækjudalsá	ISKK.	Zircon	ISKK-19.1	Jan. '13.	R33 zircon (419±1 Ma), Black et al. (2004).	0.00866495	70.9146	0.00380857	5.93158	67.1266	37.2372	0.515773	1.90115	530.866	2.30278	0.0491014	24.8419	0.00018992	0.354866	0.0224207	48.5093	0.00157873	13.8916	0.28637	12.0888	0.335296	TLC2.
Carley 2014.	Krossá-Kækjudalsá	ISKK.	Zircon	ISKK-2.1	Jan. '13.	R33 zircon (419±1 Ma), Black et al. (2004).	0.0262902	33.6242	0.00742151	4.95031	51.1331	19.4095	0.350622	0.87438	288.744	2.44103	0.305622	10.1321	0.017562	32.8069	0.050266	54.0333	0.0017624	32.5419	0.602257	14.9839	0.946484	TLC2.
Carley 2014.	Krossá-Kækjudalsá	ISKK.	Zircon	ISKK-20.1	Jan. '13.	R33 zircon (419±1 Ma), Black et al. (2004).	1e-32	100	0.00411224	3.0825	1047.67	1641.68	1.44287	0.533554	496.184	2.36556	0.0446396	7.24706	-0.000113486	-0.212033	0.0124045	7.62337	0.00201538	2.36556	0.310303	13.0064	0.312013	TLC2.
Carley 2014.	Krossá-Kækjudalsá	ISKK.	Zircon	ISKK-21.1	Jan. '13.	R33 zircon (419±1 Ma), Black et al. (2004).	0.00131836	100.044	0.00428855	3.26114	197.136	129.75	0.607424	0.357083	486.787	2.02962	0.0456321	15.9395	-4.65688e-05	-0.0870057	0.00708887	85.0252	0.00200369	3.24072	0.0381148	13.2407	0.294829	TLC2.
Carley 2014.	Krossá-Kækjudalsá	ISKK.	Zircon	ISKK-22.1	Jan. '13.	R33 zircon (419±1 Ma), Black et al. (2004).	-0.00734694	70.8836	0.00342862	13.9639	81.4049	34.3327	0.384131	0.6464	551.739	12.2803	0.0367347	26.2899	-0.00064734	-1.20958	0.0378753	47.9881	0.00206127	14.9672	0.311893	11.8143	1.45691	TLC2.
Carley 2014.	Krossá-Kækjudalsá	ISKK.	Zircon	ISKK-23.1	Jan. '13.	R33 zircon (419±1 Ma), Black et al. (2004).	0.00114953	44.7385	0.0042873	1.35844	1257.44	956.79	0.69817	0.141419	476.031	1.90355	0.0580221	5.73202	0.000792544	1.48072	0.011602	20.9221	0.00205559	2.14189	0.102374	13.3277	0.259825	TLC2.
Carley 2014.	Krossá-Kækjudalsá	ISKK.	Zircon	ISKK-24.1	Jan. '13.	R33 zircon (419±1 Ma), Black et al. (2004).	0.00359376	44.7749	0.00392609	2.40102	420.651	421.087	0.926471	1.26706	518.562	1.95313	0.0493901	10.7935	0.000209107	0.390708	0.001802	289.231	0.00179892	3.76858	0.0130297	12.3709	0.255566	TLC2.
Carley 2014.	Krossá-Kækjudalsá	ISKK.	Zircon	ISKK-25.1	Jan. '13.	R33 zircon (419±1 Ma), Black et al. (2004).	0.00764728	57.882	0.00381357	4.54123	112.853	53.4131	0.433301	0.533596	503.472	8.08405	0.0513595	18.6514	0.00034206	0.639109	0.0186663	30.4626	0.00170241	12.5879	0.413225	12.7095	1.03838	TLC2.
Carley 2014.	Krossá-Kækjudalsá	ISKK.	Zircon	ISKK-26.1	Jan. '13.	R33 zircon (419±1 Ma), Black et al. (2004).	-0.00329429	100.11	0.00373346	5.15142	90.8019	47.6819	0.478241	0.57041	509.747	8.08521	0.0470961	22.0971	5.34051e-05	0.0997832	0.0266654	48.6915	0.00208251	9.95309	0.204411	12.6213	1.03324	TLC2.
Carley 2014.	Krossá-Kækjudalsá	ISKK.	Zircon	ISKK-3.1	Jan. '13.	R33 zircon (419±1 Ma), Black et al. (2004).	2.32038e-11	9999	0.00386089	4.37206	120.47	64.0756	0.486336	0.497467	498.388	3.49772	0.0433138	19.3032	-0.000203238	-0.379724	0.0119829	19.6175	0.00200647	3.49772	0.178296	12.9706	0.473502	TLC2.
Carley 2014.	Krossá-Kækjudalsá	ISKK.	Zircon	ISKK-5.1	Jan. '13.	R33 zircon (419±1 Ma), Black et al. (2004).	0.00106467	100.035	0.00463022	3.09517	224.469	207.697	1.08711	16.5976	455.502	4.93828	0.051656	13.7579	0.000360415	0.67333	0.0105994	50.1126	0.00215172	5.33928	0.106546	14.0417	0.704453	TLC2.
Carley 2014.	Krossá-Kækjudalsá	ISKK.	Zircon	ISKK-53.1	Jan. '13.	R33 zircon (419±1 Ma), Black et al. (2004).	0.00548238	27.7856	0.00481853	1.84094	587.006	792.999	1.24497	0.167793	445.163	4.00818	0.126907	5.42552	0.00545878	10.199	0.0127678	57.3108	0.00201627	5.11079	0.0891767	12.991	0.535373	TLC2.
Carley 2014.	Krossá-Kækjudalsá	ISKK.	Zircon	ISKK-54.1	Jan. '13.	R33 zircon (419±1 Ma), Black et al. (2004).	1e-32	100	0.00423813	2.50501	379.603	248.163	0.600869	0.269216	503.376	3.75328	0.0430126	12.1345	-0.000223479	-0.417545	0.0117816	12.7017	0.00198659	3.75328	0.295495	12.847	0.4892	TLC2.
Carley 2014.	Krossá-Kækjudalsá	ISKK.	Zircon	ISKK-56.1	Jan. '13.	R33 zircon (419±1 Ma), Black et al. (2004).	0.000494317	100.016	0.00417387	1.9974	577.068	566.691	0.90502	1.01016	474.523	1.93378	0.0391664	10.1659	-0.000485111	-0.906313	0.00913558	26.9077	0.00208792	2.14678	0.0797828	13.6936	0.273291	TLC2.
Carley 2014.	Krossá-Kækjudalsá	ISKK.	Zircon	ISKK-57.1	Jan. '13.	R33 zircon (419±1 Ma), Black et al. (2004).	0.00448703	57.8213	0.00467636	3.47007	176.323	103.943	0.542682	0.412883	442.233	2.74808	0.109185	11.0404	0.00425796	7.95515	0.0121774	103.421	0.00207169	5.9619	0.0576469	13.4034	0.429828	TLC2.
Carley 2014.	Krossá-Kækjudalsá	ISKK.	Zircon	ISKK-58.1	Jan. '13.	R33 zircon (419±1 Ma), Black et al. (2004).	0.0048829	70.8257	0.00462248	4.42483	99.0228	48.6729	0.4519	0.555272	452.627	4.49208	0.114951	13.9033	0.00464898	8.68599	0.0117694	139.335	0.00200777	8.41026	0.0603598	12.9921	0.650252	TLC2.
Carley 2014.	Krossá-Kækjudalsá	ISKK.	Zircon	ISKK-59.1	Jan. '13.	R33 zircon (419±1 Ma), Black et al. (2004).	0.00436187	57.8189	0.00397244	3.43862	206.267	109.414	0.485208	0.394379	492.292	6.4263	0.040594	17.1688	-0.000387732	-0.724414	0.00772397	34.6021	0.00186577	8.22277	0.237638	13.1761	0.85396	TLC2.
Carley 2014.	Krossá-Kækjudalsá	ISKK.	Zircon	ISKK-6.1	Jan. '13.	R33 zircon (419±1 Ma), Black et al. (2004).	0.00210543	100.07	0.00396943	4.16893	141.774	76.5016	0.495981	0.468823	504.549	5.56391	0.061085	17.5269	0.00100103	1.87036	0.00770058	119.188	0.001904	6.91008	0.0579762	12.5254	0.717564	TLC2.
Carley 2014.	Krossá-Kækjudalsá	ISKK.	Zircon	ISKK-60.1	Jan. '13.	R33 zircon (419±1 Ma), Black et al. (2004).	0.00261147	57.7853	0.00425658	2.63366	315.656	234.163	0.686862	1.3637	484.412	1.97707	0.0625986	25.4408	0.00110292	2.06066	0.0062004	128.243	0.00196363	3.56292	0.0277825	13.0203	0.371297	TLC2.
Carley 2014.	Krossá-Kækjudalsá	ISKK.	Zircon	ISKK-61.1	Jan. '13.	R33 zircon (419±1 Ma), Black et al. (2004).	0.00347624	50.0579	0.00406445	2.6399	331.01	234.279	0.651066	0.27099	530.544	5.39283	0.0576056	25.5164	0.000766088	1.43145	0.000851112	940.936	0.00176243	6.41674	0.00681953	11.9655	0.683219	TLC2.
Carley 2014.	Krossá-Kækjudalsá	ISKK.	Zircon	ISKK-62.1	Jan. '13.	R33 zircon (419±1 Ma), Black et al. (2004).	-0.00187656	100.063	0.00406492	10.9888	126.909	81.7632	0.578291	1.85217	455.548	8.08374	0.0906677	14.0274	0.00300374	5.61193	0.0363192	25.1596	0.00227212	8.76554	0.348398	13.3429	1.10156	TLC2.
Carley 2014.	Krossá-Kækjudalsá	ISKK.	Zircon	ISKK-63.1	Jan. '13.	R33 zircon (419±1 Ma), Black et al. (2004).	0.00239298	100.08	0.00346043	4.41207	134.298	74.1106	0.50685	0.917621	544.941	3.69847	0.0467074	18.9079	2.81304e-05	0.0525628	0.00235488	408.693	0.00175301	5.96845	0.0146037	11.8125	0.456129	TLC2.
Carley 2014.	Krossá-Kækjudalsá	ISKK.	Zircon	ISKK-64.1	Jan. '13.	R33 zircon (419±1 Ma), Black et al. (2004).	0.00209229	70.76	0.00382947	2.88162	289.049	215.728	0.683301	0.286489	515.917	3.01655	0.0569948	43.361	0.000724263	1.35326	0.00649265	137.467	0.00186252	4.16979	0.030333	12.3142	0.538551	TLC2.
Carley 2014.	Krossá-Kækjudalsá	ISKK.	Zircon	ISKK-65.1	Jan. '13.	R33 zircon (419±1 Ma), Black et al. (2004).	9.68851e-12	9999	0.00407201	2.7805	289.778	352.887	1.12083	0.908923	479.785	1.98407	0.0513236	12.715	0.000338816	0.633015	0.0147493	12.8689	0.00208427	1.98407	0.154176	13.3372	0.286694	TLC2.
Carley 2014.	Krossá-Kækjudalsá	ISKK.	Zircon	ISKK-66.1	Jan. '13.	R33 zircon (419±1 Ma), Black et al. (2004).	0.00978904	30.2494	0.00424922	2.65549	302.323	248.641	0.758584	1.05903	472.29	1.9782	0.0790124	10.0122	0.00221462	4.1377	0.021598	13.6498	0.00173009	7.05382	0.516772	13.0712	0.292193	TLC2.
Carley 2014.	Krossá-Kækjudalsá	ISKK.	Zircon	ISKK-67.1	Jan. '13.	R33 zircon (419±1 Ma), Black et al. (2004).	0.00238864	70.767	0.00342712	10.2655	235.595	139.888	0.543307	0.78985	539.409	6.39293	0.0399806	16.1919	-0.000427776	-0.799303	0.000676934	1023.92	0.00177114	7.19717	0.00702905	12.0352	0.775096	TLC2.
Carley 2014.	Krossá-Kækjudalsá	ISKK.	Zircon	ISKK-68.1	Jan. '13.	R33 zircon (419±1 Ma), Black et al. (2004).	0.00184049	100.061	0.00389033	12.1181	142.408	101.43	0.653579	0.402496	512.819	8.70061	0.0520807	45.0273	0.000391227	0.730986	0.00626876	156.771	0.00188295	9.40208	0.0599733	12.4666	1.14616	TLC2.
Carley 2014.	Krossá-Kækjudalsá	ISKK.	Zircon	ISKK-69.1	Jan. '13.	R33 zircon (419±1 Ma), Black et al. (2004).	-0.000247743	100.008	0.00450204	3.1756	1099.24	1836.97	1.53377	0.516922	474.025	1.90677	0.052028	6.23092	0.000386331	0.721779	0.0162597	8.90478	0.00211936	1.96165	0.220292	13.487	0.262948	TLC2.
Carley 2014.	Krossá-Kækjudalsá	ISKK.	Zircon	ISKK-7.1	Jan. '13.	R33 zircon (419±1 Ma), Black et al. (2004).	-0.00491535	100.164	0.00377456	6.35012	72.4384	52.3184	0.670612	1.47701	572.668	16.8084	0.0708174	22.2597	0.00166229	3.10629	0.0355471	48.7502	0.00190661	18.8023	0.385686	10.8979	1.84439	TLC2.
Carley 2014.	Krossá-Kækjudalsá	ISKK.	Zircon	ISKK-70.1	Jan. '13.	R33 zircon (419±1 Ma), Black et al. (2004).	0.00315678	57.7957	0.00427992	2.92244	250.398	211.787	0.780766	0.982582	467.418	4.68549	0.0501715	35.4583	0.000260296	0.4863	0.000246034	4026.52	0.00201324	5.92237	0.00147084	13.7099	0.71281	TLC2.
Carley 2014.	Krossá-Kækjudalsá	ISKK.	Zircon	ISKK-71.1	Jan. '13.	R33 zircon (419±1 Ma), Black et al. (2004).	0.0111157	33.4566	0.00461482	3.16085	209.418	128.781	0.569742	1.18946	450.283	3.93982	0.205338	17.9882	0.0107729	20.1302	0.00967905	210.738	0.00175954	9.61523	0.0456264	11.4243	0.805552	TLC2.
Carley 2014.	Krossá-Kækjudalsá	ISKK.	Zircon	ISKK-72.1	Jan. '13.	R33 zircon (419±1 Ma), Black et al. (2004).	1e-32	100	0.00369708	5.08489	94.2609	44.6913	0.435389	0.587094	524.829	3.48435	0.074215	19.0804	0.00189123	3.53384	0.0194973	19.396	0.00190538	3.48435	0.179643	11.838	0.467149	TLC2.
Carley 2014.	Krossá-Kækjudalsá	ISKK.	Zircon	ISKK-73.1	Jan. '13.	R33 zircon (419±1 Ma), Black et al. (2004).	0.0010763	100.036	0.00386035	2.93339	270.88	178.271	0.601515	0.308852	515.637	1.99064	0.0369751	15.56	-0.000632142	-1.18111	0.00538901	86.3495	0.00190035	2.85961	0.0331167	12.6371	0.267311	TLC2.
Carley 2014.	Krossá-Kækjudalsá	ISKK.	Zircon	ISKK-74.1	Jan. '13.	R33 zircon (419±1 Ma), Black et al. (2004).	-0.00318979	70.7858	0.00414739	3.61827	172.64	104.6	0.55737	0.39637	485.485	4.55639	0.0318388	18.563	-0.000981193	-1.83315	0.023201	40.3347	0.00218255	6.05067	0.150012	13.5075	0.622954	TLC2.
Carley 2014.	Krossá-Kækjudalsá	ISKK.	Zircon	ISKK-75.1	Jan. '13.	R33 zircon (419±1 Ma), Black et al. (2004).	0.00302622	57.7932	0.00407494	2.82152	283.315	220.17	0.719581	1.39339	500.199	1.98594	0.041049	13.9451	-0.000356632	-0.66632	0.0017223	331.375	0.00188617	3.99248	0.0120482	12.9605	0.273577	TLC2.
Carley 2014.	Krossá-Kækjudalsá	ISKK.	Zircon	ISKK-76.1	Jan. '13.	R33 zircon (419±1 Ma), Black et al. (2004).	0.0120536	50.2005	0.00327756	4.96716	96.0141	55.0033	0.519974	0.509777	560.758	5.66314	0.0675256	19.3749	0.00143898	2.68894	0.0297178	41.384	0.00138163	15.6545	0.378274	11.1771	0.660536	TLC2.
Carley 2014.	Krossá-Kækjudalsá	ISKK.	Zircon	ISKK-77.1	Jan. '13.	R33 zircon (419±1 Ma), Black et al. (2004).	0.00724685	35.4406	0.00401096	2.70559	289.43	181.982	0.57379	0.297818	470.064	2.56563	0.11446	8.28756	0.00461629	8.62524	0.000351501	3436.54	0.00183932	6.11459	0.00177928	12.5189	0.360612	TLC2.
Carley 2014.	Krossá-Kækjudalsá	ISKK.	Zircon	ISKK-78.1	Jan. '13.	R33 zircon (419±1 Ma), Black et al. (2004).	0.00182075	100.061	0.00441782	10.1497	141.235	124.357	0.841796	5.09548	499.564	12.0337	0.0617133	15.6168	0.00104344	1.94959	0.00917882	87.9587	0.00193365	12.539	0.142556	12.6401	1.52815	TLC2.
Carley 2014.	Krossá-Kækjudalsá	ISKK.	Zircon	ISKK-79.1	Jan. '13.	R33 zircon (419±1 Ma), Black et al. (2004).	0.0323515	12.2843	0.0252481	31.9723	125.205	68.99	0.509025	1.23578	77.7128	26.5935	0.669386	2.62661	0.0422015	78.8187	0.290569	39.2647	0.00509285	32.5411	0.828762	17.5464	5.0122	TLC2.
Carley 2014.	Krossá-Kækjudalsá	ISKK.	Zircon	ISKK-8.1	Jan. '13.	R33 zircon (419±1 Ma), Black et al. (2004).	0.00343949	57.8012	0.00407066	3.02045	279.286	191.193	0.625884	0.320636	488.079	2.00351	0.0521929	13.6726	0.000398012	0.743625	0.000441552	1923.3	0.00191719	4.44644	0.00231188	13.0962	0.287972	TLC2.
Carley 2014.	Krossá-Kækjudalsá	ISKK.	Zircon	ISKK-80.1	Jan. '13.	R33 zircon (419±1 Ma), Black et al. (2004).	0.00926243	50.1541	0.003619	9.294	125.083	64.3543	0.470398	0.47959	532.412	9.39731	0.0493181	20.5911	0.00020465	0.382391	0.0247178	38.9648	0.00155318	14.0887	0.361576	12.0504	1.1423	TLC2.
Carley 2014.	Krossá-Kækjudalsá	ISKK.	Zircon	ISKK-81.1	Jan. '13.	R33 zircon (419±1 Ma), Black et al. (2004).	0.0021449	70.7612	0.00394271	2.96605	254.704	160.001	0.581605	1.25508	528.626	2.4187	0.057107	26.584	0.000732249	1.36822	0.00615138	117.001	0.00181588	3.81815	0.0326335	12.0166	0.372948	TLC2.
Carley 2014.	Krossá-Kækjudalsá	ISKK.	Zircon	ISKK-82.1	Jan. '13.	R33 zircon (419±1 Ma), Black et al. (2004).	0.0266189	23.1442	0.00613714	3.39652	124.309	67.8784	0.493142	1.00106	291.748	5.35421	0.324524	6.6785	0.0188429	35.2018	0.0432442	49.123	0.00172311	23.512	0.478636	14.3018	0.975368	TLC2.
Carley 2014.	Krossá-Kækjudalsá	ISKK.	Zircon	ISKK-83.1	Jan. '13.	R33 zircon (419±1 Ma), Black et al. (2004).	0.00509664	44.7973	0.00472508	2.86391	224.284	146.422	0.595269	0.331013	424.933	3.01089	0.197961	22.8663	0.0102723	19.1936	0.038387	46.2913	0.00212921	5.59438	0.120852	12.247	0.942695	TLC2.
Carley 2014.	Krossá-Kækjudalsá	ISKK.	Zircon	ISKK-84.1	Jan. '13.	R33 zircon (419±1 Ma), Black et al. (2004).	0.0010524	70.7355	0.00372481	7.7853	505.333	428.694	0.775713	0.680269	505.216	3.66201	0.0531317	9.00901	0.000462193	0.86357	0.0100114	33.2208	0.00194043	3.92725	0.118217	12.6371	0.468856	TLC2.
Carley 2014.	Krossá-Kækjudalsá	ISKK.	Zircon	ISKK-9.1	Jan. '13.	R33 zircon (419±1 Ma), Black et al. (2004).	0.00191042	100.064	0.00442148	3.91644	143.075	125.325	0.80361	0.389763	467.399	4.77407	0.128131	11.2807	0.00554244	10.3558	0.0289899	31.0747	0.00206313	6.04249	0.19445	12.352	0.640879	TLC2.
Carley 2014.	Krossá-Kækjudalsá	ISKK.	Zircon	ISKK_9.1	Jan. '13.	R33 zircon (419±1 Ma), Black et al. (2004).	0.00214725	44.7534	0.00312244	1.85849	623.664	389.593	0.534656	2.48252	542.015	4.94157	0.0760356	6.8704	0.00201505	3.76532	0.0108052	36.0647	0.00177094	5.28382	0.14651	11.4354	0.570179	TLC3.
Carley 2014.	Krossá-Kækjudalsá	ISKK.	Zircon	ISKK-34.1	Jan. '13.	R33 zircon (419±1 Ma), Black et al. (2004).	0.0018889	100.063	0.00356209	3.86955	190.081	118.124	0.547898	0.403249	548.017	1.38606	0.0513719	17.1528	0.00034424	0.643235	0.0054974	137.636	0.00176036	3.91457	0.0284416	11.6769	0.208133	TLC3.
Carley 2014.	Krossá-Kækjudalsá	ISKK.	Zircon	ISKK_10.1	Jan. '13.	R33 zircon (419±1 Ma), Black et al. (2004).	0.00322638	70.7867	0.00374849	3.65551	168.572	109.764	0.576154	0.383932	546.018	1.37226	0.0535558	17.1336	0.000492143	0.919599	0.00079041	1173.06	0.00172103	4.7441	0.00404421	11.6871	0.210784	TLC3.
Carley 2014.	Krossá-Kækjudalsá	ISKK.	Zircon	ISKK-29.1	Jan. '13.	R33 zircon (419±1 Ma), Black et al. (2004).	-0.00251396	100.084	0.00367078	4.51106	131.211	67.2257	0.453148	1.02954	537.93	7.24471	0.0585556	21.2451	0.000830659	1.55213	0.0250797	38.8422	0.0019463	8.5235	0.219439	11.787	0.87394	TLC3.
Carley 2014.	Krossá-Kækjudalsá	ISKK.	Zircon	ISKK-31.1	Jan. '13.	R33 zircon (419±1 Ma), Black et al. (2004).	0.00674662	57.8647	0.00378367	4.25122	136.508	77.7327	0.504774	0.976499	538.951	4.04414	0.0525056	18.9809	0.000420792	0.786265	0.0135433	22.7646	0.00162155	9.27495	0.407429	11.8561	0.502292	TLC3.
Carley 2014.	Krossá-Kækjudalsá	ISKK.	Zircon	ISKK-39.1	Jan. '13.	R33 zircon (419±1 Ma), Black et al. (2004).	0.0280689	20.6412	0.0076772	5.61831	202.199	116.37	0.507032	0.947588	239.683	6.65034	0.496763	4.46368	0.0305112	57.0128	0.0334049	140.552	0.00198391	23.7188	0.168754	11.5513	1.07582	TLC3.
Carley 2014.	Krossá-Kækjudalsá	ISKK.	Zircon	ISKK_3.1	Jan. '13.	R33 zircon (419±1 Ma), Black et al. (2004).	-0.00398289	100.133	0.00340511	5.66044	74.9537	41.355	0.485949	1.1986	527.353	4.25816	0.0544328	22.6794	0.000551028	1.0296	0.0305072	48.363	0.00203738	8.13858	0.168281	12.0869	0.548556	TLC3.
Carley 2014.	Krossá-Kækjudalsá	ISKK.	Zircon	ISKK_20.1	Jan. '13.	R33 zircon (419±1 Ma), Black et al. (2004).	-6.13843e-19	9999	0.00354872	5.50896	84.8184	37.3478	0.385814	0.663489	528.892	1.70271	0.0465529	23.5039	1.71942e-05	0.0321272	0.0121361	23.5655	0.00189074	1.70271	0.0722545	12.1731	0.267026	TLC3.
Carley 2014.	Krossá-Kækjudalsá	ISKK.	Zircon	ISKK-36.1	Jan. '13.	R33 zircon (419±1 Ma), Black et al. (2004).	0.00242718	100.081	0.00362551	4.41347	135.011	64.1551	0.420476	1.23076	535.782	1.49619	0.0355987	21.6962	-0.00072477	-1.35422	0.000601179	1458.24	0.00178179	4.98431	0.00341805	12.1832	0.21673	TLC3.
Carley 2014.	Krossá-Kækjudalsá	ISKK.	Zircon	ISKK-38.1	Jan. '13.	R33 zircon (419±1 Ma), Black et al. (2004).	-3.65353e-19	9999	0.00396207	4.2617	142.785	85.86	0.528111	0.468356	519.082	4.56974	0.0583791	18.7132	0.000818149	1.5287	0.0155068	19.2631	0.00192648	4.56974	0.237228	12.2174	0.583685	TLC3.
Carley 2014.	Krossá-Kækjudalsá	ISKK.	Zircon	ISKK-28.1	Jan. '13.	R33 zircon (419±1 Ma), Black et al. (2004).	-0.00402925	70.8056	0.00357659	4.02925	158.295	91.1503	0.502431	0.44117	533.197	1.42127	0.0362632	19.5908	-0.000679824	-1.27024	0.0256618	40.9364	0.00201668	5.15714	0.125979	12.2321	0.204849	TLC3.
Carley 2014.	Krossá-Kækjudalsá	ISKK.	Zircon	ISKK_6.1	Jan. '13.	R33 zircon (419±1 Ma), Black et al. (2004).	0.000531202	100.018	0.00377185	2.05952	604.139	682.302	0.992773	0.181096	520.594	1.13178	0.0539121	8.99755	0.000515547	0.963288	0.0120798	20.2817	0.00190182	1.51204	0.0745518	12.2519	0.157996	TLC3.
Carley 2014.	Krossá-Kækjudalsá	ISKK.	Zircon	ISKK_1.1	Jan. '13.	R33 zircon (419±1 Ma), Black et al. (2004).	0.00100424	100.033	0.00384453	2.81604	304.056	241.348	0.696788	0.279232	518.378	3.38299	0.053069	12.5404	0.000458359	0.856429	0.00994076	44.0449	0.0018929	3.88637	0.0882365	12.3175	0.429354	TLC3.
Carley 2014.	Krossá-Kækjudalsá	ISKK.	Zircon	ISKK_LOW_5.1	Jan. '13.	R33 zircon (419±1 Ma), Black et al. (2004).	0.00885729	57.9052	0.00373258	4.89301	116.215	66.9634	0.509229	0.525919	521.453	2.77303	0.0436304	21.6982	-0.00018104	-0.338265	0.0250669	45.4522	0.00160035	11.8135	0.259911	12.3923	0.3739	TLC3.
Carley 2014.	Krossá-Kækjudalsá	ISKK.	Zircon	ISKK-33.1	Jan. '13.	R33 zircon (419±1 Ma), Black et al. (2004).	0.00199881	100.067	0.00367324	4.01473	153.634	92.4777	0.525072	0.439534	508.056	4.11227	0.0613908	17.0537	0.00102186	1.90929	0.00818261	105.817	0.00189478	5.65525	0.0534437	12.4341	0.537845	TLC3.
Carley 2014.	Krossá-Kækjudalsá	ISKK.	Zircon	ISKK_2.1	Jan. '13.	R33 zircon (419±1 Ma), Black et al. (2004).	-0.00273473	100.091	0.00375569	4.6962	106.994	57.3528	0.471821	0.53077	519.113	1.56277	0.0391978	21.9852	-0.000481435	-0.899531	0.0217636	48.7668	0.0020248	5.11051	0.104795	12.5177	0.237696	TLC3.
Carley 2014.	Krossá-Kækjudalsá	ISKK.	Zircon	ISKK-32.1	Jan. '13.	R33 zircon (419±1 Ma), Black et al. (2004).	0.00251701	100.084	0.00383785	4.47759	127.786	74.0402	0.511134	0.492899	516.114	1.52616	0.0422299	20.3502	-0.000276097	-0.515869	0.000772386	1389.02	0.00184644	5.1695	0.00372169	12.5425	0.234489	TLC3.
Carley 2014.	Krossá-Kækjudalsá	ISKK.	Zircon	ISKK-42.1	Jan. '13.	R33 zircon (419±1 Ma), Black et al. (2004).	0.00219932	70.7625	0.00399693	2.98491	300.088	177.338	0.520427	0.333778	514.865	3.1845	0.044081	14.5917	-0.000150714	-0.281599	0.00259968	256.281	0.00186244	4.39736	0.0171583	12.5436	0.41195	TLC3.
Carley 2014.	Krossá-Kækjudalsá	ISKK.	Zircon	ISKK_26.1	Jan. '13.	R33 zircon (419±1 Ma), Black et al. (2004).	-0.00194622	100.065	0.00349182	3.97146	168.525	106.761	0.55849	1.24136	506.062	2.55598	0.0576864	17.5823	0.000770818	1.44022	0.0240046	33.386	0.0020479	4.34289	0.130081	12.5427	0.359567	TLC3.
Carley 2014.	Krossá-Kækjudalsá	ISKK.	Zircon	ISKK_24.1	Jan. '13.	R33 zircon (419±1 Ma), Black et al. (2004).	1e-32	100	0.00366795	3.7595	185.563	125.407	0.591474	0.389594	507.723	4.81009	0.0514098	16.645	0.000345605	0.645737	0.0139611	17.3261	0.00196958	4.81009	0.277621	12.6024	0.621139	TLC3.
Carley 2014.	Krossá-Kækjudalsá	ISKK.	Zircon	ISKK_17.1	Jan. '13.	R33 zircon (419±1 Ma), Black et al. (2004).	-0.00230493	70.765	0.00385751	3.06544	235.548	134.486	0.498898	0.854835	507.156	4.7794	0.0514619	14.0291	0.00034912	0.652304	0.0237847	28.0503	0.00205669	5.60171	0.199703	12.6156	0.613601	TLC3.
Carley 2014.	Krossá-Kækjudalsá	ISKK.	Zircon	ISKK_12.1	Jan. '13.	R33 zircon (419±1 Ma), Black et al. (2004).	0.000871922	100.029	0.00368075	2.62862	337.305	233.452	0.605089	0.271628	510.057	3.33242	0.0465936	12.2183	1.93691e-05	0.0361896	0.00891153	43.4463	0.00192862	3.72147	0.0856567	12.6217	0.430043	TLC3.
Carley 2014.	Krossá-Kækjudalsá	ISKK.	Zircon	ISKK_23.1	Jan. '13.	R33 zircon (419±1 Ma), Black et al. (2004).	0.00782835	57.8855	0.00373133	4.58349	120.134	67.2558	0.490414	0.507588	491.648	4.28677	0.0719392	18.6115	0.00173603	3.24363	0.0141375	32.2688	0.00173647	10.8041	0.334814	12.6741	0.5865	TLC3.
Carley 2014.	Krossá-Kækjudalsá	ISKK.	Zircon	ISKK_LOW_6.1	Jan. '13.	R33 zircon (419±1 Ma), Black et al. (2004).	0.0061256	25.8726	0.00454621	6.01014	989.797	887.53	0.790993	0.612931	487.384	6.84951	0.0781239	6.68941	0.00215493	4.0263	0.0049829	90.8583	0.00181694	7.62216	0.0838906	12.6815	0.87242	TLC3.
Carley 2014.	Krossá-Kækjudalsá	ISKK.	Zircon	ISKK-46.1	Jan. '13.	R33 zircon (419±1 Ma), Black et al. (2004).	0.000953212	70.7331	0.00407252	1.95559	657.585	565.42	0.761417	0.570412	507.324	1.12917	0.0442508	9.63331	-0.000139452	-0.260554	0.00797753	37.5791	0.00193602	1.70882	0.0454726	12.7272	0.159087	TLC3.
Carley 2014.	Krossá-Kækjudalsá	ISKK.	Zircon	ISKK-37.1	Jan. '13.	R33 zircon (419±1 Ma), Black et al. (2004).	-0.00186483	70.7546	0.00411417	2.7281	325.454	260.949	0.704366	0.278076	499.577	1.23797	0.0556773	12.2252	0.000634484	1.18547	0.0234106	23.5053	0.00207144	2.68473	0.114218	12.7382	0.192738	TLC3.
Carley 2014.	Krossá-Kækjudalsá	ISKK.	Zircon	ISKK-40.1	Jan. '13.	R33 zircon (419±1 Ma), Black et al. (2004).	0.00300601	100.1	0.0039981	4.90642	103.595	69.0592	0.585937	0.522548	499.76	4.94973	0.0521042	20.116	0.000392395	0.733148	0.00141339	934.733	0.00188858	7.74473	0.0082855	12.7918	0.655378	TLC3.
Carley 2014.	Krossá-Kækjudalsá	ISKK.	Zircon	ISKK_16.1	Jan. '13.	R33 zircon (419±1 Ma), Black et al. (2004).	1e-32	100	0.00376379	3.01991	265.061	184.559	0.61123	0.309595	506.546	4.25066	0.0397337	15.3983	-0.000445533	-0.83243	0.0108154	15.9742	0.00197416	4.25066	0.266095	12.8194	0.553352	TLC3.
Carley 2014.	Krossá-Kækjudalsá	ISKK.	Zircon	ISKK-35.1	Jan. '13.	R33 zircon (419±1 Ma), Black et al. (2004).	1e-32	100	0.00422656	4.22054	127.192	114.444	0.791044	0.416549	481.823	1.50716	0.0778866	15.3511	0.00213867	3.99587	0.0222883	15.4249	0.00207545	1.50716	0.0977095	12.8318	0.279636	TLC3.
Carley 2014.	Krossá-Kækjudalsá	ISKK.	Zircon	ISKK_11.1	Jan. '13.	R33 zircon (419±1 Ma), Black et al. (2004).	0.0101504	57.93	0.00388497	5.20568	83.217	46.7791	0.486404	2.26681	503.021	1.67949	0.0421052	23.6278	-0.000284968	-0.53243	0.0319429	53.0614	0.00161097	13.6611	0.257458	12.8708	0.269458	TLC3.
Carley 2014.	Krossá-Kækjudalsá	ISKK.	Zircon	ISKK_27.1	Jan. '13.	R33 zircon (419±1 Ma), Black et al. (2004).	-0.00522648	70.8338	0.00434513	4.56845	120.552	80.7584	0.595157	0.494845	485.026	7.9212	0.0709518	18.1854	0.00166891	3.11816	0.0433906	34.2467	0.00226307	10.122	0.295562	12.8636	1.04105	TLC3.
Carley 2014.	Krossá-Kækjudalsá	ISKK.	Zircon	ISKK-43.1	Jan. '13.	R33 zircon (419±1 Ma), Black et al. (2004).	0.00339793	70.7907	0.00387947	3.66516	196.625	122.637	0.548611	0.396024	487.052	1.37709	0.0663604	14.5714	0.00135789	2.53706	0.00375204	288.28	0.00192282	4.99258	0.0173185	12.8869	0.239988	TLC3.
Carley 2014.	Krossá-Kækjudalsá	ISKK.	Zircon	ISKK_LOW_4.1	Jan. '13.	R33 zircon (419±1 Ma), Black et al. (2004).	0.00301406	57.793	0.00392101	2.84101	305.73	354.018	1.0075	0.899774	475.885	1.8317	0.0828958	10.167	0.00247787	4.62959	0.0103692	76.4439	0.00198301	3.90502	0.0510835	12.9061	0.276791	TLC3.
Carley 2014.	Krossá-Kækjudalsá	ISKK.	Zircon	ISKK_25.1	Jan. '13.	R33 zircon (419±1 Ma), Black et al. (2004).	0.00294246	100.098	0.0039142	4.82301	99.0084	44.7388	0.397008	0.595444	504.024	2.97655	0.0370532	23.4313	-0.000627236	-1.17191	0.00244418	324.17	0.00187496	6.53978	0.0201739	12.9268	0.409301	TLC3.
Carley 2014.	Krossá-Kækjudalsá	ISKK.	Zircon	ISKK_LOW_7.1	Jan. '13.	R33 zircon (419±1 Ma), Black et al. (2004).	5.09495e-12	9999	0.00417353	2.0185	682.232	613.632	0.795759	0.196021	500.562	1.13725	0.0423005	9.90176	-0.000271825	-0.50787	0.0116517	9.96685	0.00199775	1.13725	0.114103	12.9308	0.161987	TLC3.
Carley 2014.	Krossá-Kækjudalsá	ISKK.	Zircon	ISKK_13.1	Jan. '13.	R33 zircon (419±1 Ma), Black et al. (2004).	0.00563556	57.8434	0.00393097	3.88344	159.885	113.852	0.625118	0.406578	499.983	2.836	0.0432404	19.4233	-0.000208156	-0.388914	0.012365	21.9975	0.00178947	7.37442	0.335239	12.9304	0.39116	TLC3.
Carley 2014.	Krossá-Kækjudalsá	ISKK.	Zircon	ISKK_14.1	Jan. '13.	R33 zircon (419±1 Ma), Black et al. (2004).	0.00436046	70.8134	0.00423647	4.2005	125.921	66.0271	0.461339	0.507777	463.129	5.43367	0.0997952	13.6625	0.00362244	6.76806	0.00942121	152.663	0.00198332	8.30503	0.0544013	12.9642	0.743656	TLC3.
Carley 2014.	Krossá-Kækjudalsá	ISKK.	Zircon	ISKK_4.1	Jan. '13.	R33 zircon (419±1 Ma), Black et al. (2004).	-0.00255222	100.085	0.00355637	4.53093	110.782	53.2026	0.417942	0.533777	495.565	1.51187	0.0447112	19.939	-0.000108656	-0.203009	0.0235381	44.1792	0.00211412	4.79965	0.10864	13.0214	0.245292	TLC3.
Carley 2014.	Krossá-Kækjudalsá	ISKK.	Zircon	ISKK-44.1	Jan. '13.	R33 zircon (419±1 Ma), Black et al. (2004).	0.000995848	70.7341	0.00376588	5.10002	644.779	382.15	0.517599	0.221545	495.253	2.97534	0.0429731	9.81621	-0.00022643	-0.423052	0.00763073	41.8918	0.0019816	3.26359	0.077905	13.0582	0.394405	TLC3.
Carley 2014.	Krossá-Kækjudalsá	ISKK.	Zircon	ISKK_5.1	Jan. '13.	R33 zircon (419±1 Ma), Black et al. (2004).	0.00187852	70.7549	0.00374545	2.72668	303.532	231.086	0.672157	1.272	489.639	1.21795	0.0504884	26.735	0.000282574	0.527948	0.00594979	115.135	0.00197064	2.84728	0.0247299	13.0829	0.275243	TLC3.
Carley 2014.	Krossá-Kækjudalsá	ISKK.	Zircon	ISKK_7.1	Jan. '13.	R33 zircon (419±1 Ma), Black et al. (2004).	0.000512685	100.017	0.00351862	4.99372	579.502	407.305	0.613013	0.207163	488.831	1.12436	0.0437841	9.90832	-0.000171704	-0.3208	0.0100897	24.6741	0.0020261	1.48319	0.0601112	13.2161	0.165147	TLC3.
Carley 2014.	Krossá-Kækjudalsá	ISKK.	Zircon	ISKK_15.1	Jan. '13.	R33 zircon (419±1 Ma), Black et al. (2004).	0.000573771	100.019	0.00384768	4.56387	498.999	446.318	0.789754	1.16415	481.675	4.07644	0.0507754	9.42992	0.000301739	0.563746	0.0119675	23.746	0.00205383	4.21806	0.177632	13.2942	0.547562	TLC3.
Carley 2014.	Krossá-Kækjudalsá	ISKK.	Zircon	ISKK_LOW_1.1	Jan. '13.	R33 zircon (419±1 Ma), Black et al. (2004).	0.00111524	100.037	0.00417101	6.29332	279.73	238.545	0.751163	0.298886	486.398	5.39886	0.0408515	14.9287	-0.000370493	-0.692197	0.00663929	77.0824	0.00201309	5.80339	0.0752881	13.3313	0.726441	TLC3.
Carley 2014.	Krossá-Kækjudalsá	ISKK.	Zircon	ISKK_17.2	Jan. '13.	R33 zircon (419±1 Ma), Black et al. (2004).	-0.00573126	57.8452	0.00377671	3.93056	147.061	79.7192	0.47511	0.449248	489.979	1.41998	0.0327602	20.0376	-0.000918601	-1.71623	0.0344249	37.5952	0.00225944	5.77223	0.153536	13.3684	0.218831	TLC3.
Carley 2014.	Krossá-Kækjudalsá	ISKK.	Zircon	ISKK_8.1	Jan. '13.	R33 zircon (419±1 Ma), Black et al. (2004).	0.00245896	25.841	0.00438816	1.14944	1479.44	1008.53	0.631324	8.33099	460.169	3.09506	0.0824423	9.50733	0.00244659	4.57099	0.013187	27.9797	0.00207328	3.33582	0.119223	13.3546	0.435708	TLC3.
Carley 2014.	Krossá-Kækjudalsá	ISKK.	Zircon	ISKK_18.1	Jan. '13.	R33 zircon (419±1 Ma), Black et al. (2004).	0.000914787	100.03	0.00375426	2.7154	307.362	189.895	0.541254	0.296003	483.451	6.17422	0.0429718	13.5357	-0.000226937	-0.423987	0.00817796	52.6281	0.00203311	6.41455	0.121884	13.3768	0.831122	TLC3.
Carley 2014.	Krossá-Kækjudalsá	ISKK.	Zircon	ISKK_LOW_3.1	Jan. '13.	R33 zircon (419±1 Ma), Black et al. (2004).	0.00344753	40.8717	0.00437653	5.7289	580.703	661.283	1.00569	0.198323	476.245	3.91667	0.0533366	9.33567	0.000475078	0.887591	0.000157814	4059.62	0.00196452	4.82263	0.00118795	13.4018	0.531397	TLC3.
Carley 2014.	Krossá-Kækjudalsá	ISKK.	Zircon	ISKK-41.1	Jan. '13.	R33 zircon (419±1 Ma), Black et al. (2004).	-0.00141881	100.047	0.00418622	12.7579	226.242	173.755	0.663993	2.40428	469.094	8.5278	0.0580671	14.9586	0.00079534	1.48592	0.0235853	28.7193	0.00218828	8.91056	0.310264	13.5239	1.16228	TLC3.
Carley 2014.	Krossá-Kækjudalsá	ISKK.	Zircon	ISKK-30.1	Jan. '13.	R33 zircon (419±1 Ma), Black et al. (2004).	0.00178536	70.7527	0.00406729	2.65461	340.622	300.007	0.771208	0.26609	469.509	3.33556	0.0563395	11.3319	0.000678303	1.26726	0.00835079	70.7691	0.00205884	4.13358	0.0584095	13.5419	0.464756	TLC3.
Carley 2014.	Krossá-Kækjudalsá	ISKK.	Zircon	ISKK_22.1	Jan. '13.	R33 zircon (419±1 Ma), Black et al. (2004).	0.00289141	70.7788	0.00409469	3.38987	190.366	182.016	0.834503	0.339225	473.869	3.91664	0.0433357	16.8527	-0.000202635	-0.378576	0.000539519	1627.75	0.00199629	5.62813	0.00345761	13.6409	0.548429	TLC3.
Carley 2014.	Krossá-Kækjudalsá	ISKK.	Zircon	ISKK_21.1	Jan. '13.	R33 zircon (419±1 Ma), Black et al. (2004).	0.00112895	100.038	0.00387138	9.65007	261.957	193.495	0.646177	0.307434	476.057	9.2029	0.0392299	14.934	-0.000480751	-0.898171	0.00625179	84.6458	0.00205629	9.45195	0.111665	13.6484	1.25914	TLC3.
Carley 2014.	Krossá-Kækjudalsá	ISKK.	Zircon	ISKK_LOW_8.1	Jan. '13.	R33 zircon (419±1 Ma), Black et al. (2004).	0.000994693	100.033	0.00443384	2.81933	289.277	220.422	0.670309	0.303458	451.306	1.2696	0.0755282	10.5647	0.00197779	3.695	0.0183254	27.563	0.00217462	2.28028	0.0827301	13.7415	0.226098	TLC3.
Carley 2014.	Krossá-Kækjudalsá	ISKK.	Zircon	ISKK_19.1	Jan. '13.	R33 zircon (419±1 Ma), Black et al. (2004).	0.00294759	50.0491	0.00443602	2.43273	353.33	315.194	0.792018	1.06452	458.382	2.34561	0.049261	10.9215	0.000198253	0.370379	0.000960473	738.644	0.00206145	3.74285	0.00506719	13.9961	0.341687	TLC3.
Carley 2014.	Krossá-Kækjudalsá	ISKK.	Zircon	ISKK-45.1	Jan. '13.	R33 zircon (419±1 Ma), Black et al. (2004).	0.0120557	31.7496	0.00468156	3.07606	235.111	245.305	0.924669	2.02435	389.453	3.4877	0.156141	8.45687	0.00743752	13.8946	0.0114274	120.215	0.0019894	9.86636	0.0820726	14.2369	0.567795	TLC3.
Carley 2014.	Krossá-Kækjudalsá	ISKK.	Zircon	ISKK_LOW_2.1	Jan. '13.	R33 zircon (419±1 Ma), Black et al. (2004).	-0.00103262	100.034	0.00415436	5.9359	290.34	265.948	0.809798	1.42029	453.453	7.95394	0.0313381	17.569	-0.00101639	-1.89876	0.0144362	35.1067	0.00224784	8.17615	0.232894	14.47	1.15429	TLC3.
Carley 2014.	Krossá-Kækjudalsá	ISKK.	Zircon	ISKK_LOW_9.1	Jan. '13.	R33 zircon (419±1 Ma), Black et al. (2004).	0.00889374	29.9395	0.0055866	52.9671	258.441	249.318	0.821197	4.75	343.654	51.0853	0.128216	164.307	0.005543	10.3532	0.00432619	1980.48	0.00242652	51.4323	0.0259697	16.7944	9.91797	TLC3.
Carley 2014.	Krossá-Kækjudalsá	ISKK.	Zircon	ISKK-1.1	Jan. '13.	R33 zircon (419±1 Ma), Black et al. (2004).	0.000634531	100.021	0.00383184	2.26893	468.44	255.854	0.535225	0.248879	495.745	1.7331	0.050653	10.2635	0.000293937	0.549185	0.0113297	26.5187	0.00199325	2.108	0.0794911	12.9191	0.239494	TLC4.
Carley 2014.	Krossá-Kækjudalsá	ISKK.	Zircon	ISKK-10.1	Jan. '13.	R33 zircon (419±1 Ma), Black et al. (2004).	-0.00444225	70.8153	0.00378178	4.25407	122.813	53.42	0.422834	0.50378	483.23	7.90738	0.0434353	18.8604	-0.000195539	-0.365327	0.0322033	39.987	0.00224116	9.59051	0.239841	13.3751	1.06585	TLC4.
Carley 2014.	Krossá-Kækjudalsá	ISKK.	Zircon	ISKK-11.1	Jan. '13.	R33 zircon (419±1 Ma), Black et al. (2004).	-2.73224e-19	9999	0.0035272	3.97718	151.005	74.7632	0.482337	0.436255	517.832	0.731594	0.0619296	16.5757	0.00105867	1.97811	0.0164896	16.5919	0.00193113	0.731594	0.0440935	12.1911	0.184437	TLC4.
Carley 2014.	Krossá-Kækjudalsá	ISKK.	Zircon	ISKK-12.1	Jan. '13.	R33 zircon (419±1 Ma), Black et al. (2004).	0.00892266	40.9461	0.00426944	3.46266	177.078	135.397	0.752976	0.341561	461.099	4.68046	0.0296147	19.7293	-0.00113285	-2.11635	0.0328441	39.6062	0.00180722	9.43362	0.238186	14.2606	0.67489	TLC4.
Carley 2014.	Krossá-Kækjudalsá	ISKK.	Zircon	ISKK-13.1	Jan. '13.	R33 zircon (419±1 Ma), Black et al. (2004).	0.0053066	70.8356	0.00351146	4.60086	109.056	48.3764	0.43148	0.528936	526.203	2.69774	0.0365566	22.3955	-0.000660163	-1.23348	0.0121531	29.9921	0.00171198	8.25004	0.275074	12.39	0.357262	TLC4.
Carley 2014.	Krossá-Kækjudalsá	ISKK.	Zircon	ISKK-14.1	Jan. '13.	R33 zircon (419±1 Ma), Black et al. (2004).	0.00893448	70.921	0.00381461	6.07585	59.4544	19.2546	0.315525	0.81481	487.873	3.09422	0.0555923	23.7802	0.000628329	1.17394	0.0237524	43.8151	0.00170756	14.5438	0.331937	13.045	0.459781	TLC4.
Carley 2014.	Krossá-Kækjudalsá	ISKK.	Zircon	ISKK-15.1	Jan. '13.	R33 zircon (419±1 Ma), Black et al. (2004).	0.00283019	70.7774	0.00366113	7.32352	192.9	108.117	0.544309	0.366712	508.16	5.54576	0.051237	15.5713	0.000333911	0.623887	0.00190032	457.519	0.00186382	6.80963	0.0148838	12.5943	0.709602	TLC4.
Carley 2014.	Krossá-Kækjudalsá	ISKK.	Zircon	ISKK-16.1	Jan. '13.	R33 zircon (419±1 Ma), Black et al. (2004).	-0.00340393	100.113	0.00395076	5.21973	82.2304	32.457	0.390844	0.64211	491.785	1.61053	0.0567322	20.5595	0.000705696	1.31851	0.0308214	44.2045	0.00216273	6.19918	0.140239	12.9224	0.28384	TLC4.
Carley 2014.	Krossá-Kækjudalsá	ISKK.	Zircon	ISKK-17.1	Jan. '13.	R33 zircon (419±1 Ma), Black et al. (2004).	0.00325968	57.7977	0.00348321	7.40098	278.113	156.743	0.557998	1.09436	523.5	4.77553	0.0442028	33.695	-0.000142195	-0.265686	0.00177604	386.676	0.00179388	6.07102	0.0157005	12.335	0.632646	TLC4.
Carley 2014.	Krossá-Kækjudalsá	ISKK.	Zircon	ISKK-18.1	Jan. '13.	R33 zircon (419±1 Ma), Black et al. (2004).	-0.00159142	100.053	0.0037488	3.61031	174.398	98.4835	0.549705	0.388151	488.34	5.06759	0.0549262	16.3359	0.00058321	1.08965	0.0225307	31.0024	0.00210864	5.83325	0.188155	13.0436	0.677276	TLC4.
Carley 2014.	Krossá-Kækjudalsá	ISKK.	Zircon	ISKK-19.1	Jan. '13.	R33 zircon (419±1 Ma), Black et al. (2004).	-0.0112126	50.1865	0.0035957	4.78332	100.906	47.1357	0.456121	0.542089	514.185	0.819851	0.0365448	23.0228	-0.000661341	-1.23566	0.0567915	34.2064	0.00235226	8.73142	0.255257	12.6796	0.168976	TLC4.
Carley 2014.	Krossá-Kækjudalsá	ISKK.	Zircon	ISKK-2.1	Jan. '13.	R33 zircon (419±1 Ma), Black et al. (2004).	0.00861244	100.287	0.00333254	8.43674	37.3648	21.4201	0.560731	0.842002	561.086	6.949	0.0545454	33.3174	0.000559598	1.04567	0.0196738	59.6199	0.00149543	20.4517	0.343035	11.359	0.831821	TLC4.
Carley 2014.	Krossá-Kækjudalsá	ISKK.	Zircon	ISKK-20.1	Jan. '13.	R33 zircon (419±1 Ma), Black et al. (2004).	0.00620499	57.8543	0.00385936	4.04697	136.318	73.2355	0.523752	0.447965	485.881	5.48496	0.0519566	17.9983	0.000381923	0.713562	0.0127759	22.8214	0.00181952	9.36168	0.410214	13.1594	0.738114	TLC4.
Carley 2014.	Krossá-Kækjudalsá	ISKK.	Zircon	ISKK-21.1	Jan. '13.	R33 zircon (419±1 Ma), Black et al. (2004).	-0.00217672	100.073	0.00387426	9.25862	128.898	68.245	0.519083	0.461032	486.201	9.04639	0.0393421	19.5797	-0.000472771	-0.883282	0.0208045	44.8694	0.00214041	9.85549	0.219648	13.362	1.21479	TLC4.
Carley 2014.	Krossá-Kækjudalsá	ISKK.	Zircon	ISKK-22.1	Jan. '13.	R33 zircon (419±1 Ma), Black et al. (2004).	0.0232846	18.5884	0.00598839	2.21389	310.48	250.965	0.787428	0.265796	304.334	1.16035	0.372066	4.10828	0.0220647	41.2267	0.00369148	837.322	0.00185631	14.3619	0.0171522	12.4374	0.433768	TLC4.
Carley 2014.	Krossá-Kækjudalsá	ISKK.	Zircon	ISKK-23.1	Jan. '13.	R33 zircon (419±1 Ma), Black et al. (2004).	-2.34669e-19	9999	0.00389304	11.6173	111.401	57.4138	0.506682	0.496087	465.507	11.0546	0.0462557	19.0858	-5.10419e-06	-0.00953584	0.0137006	22.0561	0.00214819	11.0546	0.501205	13.8346	1.53602	TLC4.
Carley 2014.	Krossá-Kækjudalsá	ISKK.	Zircon	ISKK-24.1	Jan. '13.	R33 zircon (419±1 Ma), Black et al. (2004).	0.00837988	44.8461	0.00413428	7.99062	159.581	94.5867	0.578704	0.400067	451.124	7.98911	0.0945193	12.1035	0.00326455	6.09917	0.0111406	71.4303	0.00186964	11.5379	0.161526	13.4042	1.08986	TLC4.
Carley 2014.	Krossá-Kækjudalsá	ISKK.	Zircon	ISKK-25.1	Jan. '13.	R33 zircon (419±1 Ma), Black et al. (2004).	-4.65603e-20	9999	0.00387981	4.25779	947.627	839.478	0.87936	2.28148	487.659	2.52908	0.0455088	7.33348	-5.48886e-05	-0.10255	0.0128671	7.75733	0.00205061	2.52908	0.326025	13.2191	0.338704	TLC4.
Carley 2014.	Krossá-Kækjudalsá	ISKK.	Zircon	ISKK-26.1	Jan. '13.	R33 zircon (419±1 Ma), Black et al. (2004).	0.00358533	57.804	0.0038191	3.06438	235.445	134.592	0.553333	1.17763	485.52	0.660222	0.0477375	14.3036	9.60429e-05	0.17944	0.00235648	282.856	0.00192168	4.20223	0.0148564	13.2399	0.14404	TLC4.
Carley 2014.	Krossá-Kækjudalsá	ISKK.	Zircon	ISKK-27.1	Jan. '13.	R33 zircon (419±1 Ma), Black et al. (2004).	-0.00214371	100.071	0.00386733	10.2056	130.726	68.4504	0.517717	0.916625	483.695	7.74041	0.0421596	18.7956	-0.000281963	-0.526792	0.0215684	42.6769	0.00215022	8.64663	0.202607	13.3837	1.04378	TLC4.
Carley 2014.	Krossá-Kækjudalsá	ISKK.	Zircon	ISKK-28.1	Jan. '13.	R33 zircon (419±1 Ma), Black et al. (2004).	0.00184754	100.062	0.0038399	3.84974	144.358	68.7806	0.468127	1.11533	481.845	3.09017	0.0351717	19.0397	-0.000755501	-1.41149	0.00180172	467.585	0.00200372	4.7272	0.0101098	13.5532	0.433546	TLC4.
Carley 2014.	Krossá-Kækjudalsá	ISKK.	Zircon	ISKK-29.1	Jan. '13.	R33 zircon (419±1 Ma), Black et al. (2004).	0.000862315	70.731	0.00373553	5.13495	681.083	510.93	0.730064	0.892798	507.833	2.90355	0.0487517	8.57986	0.000165518	0.309257	0.00957726	28.6254	0.00193742	3.12605	0.109205	12.6423	0.372912	TLC4.
Carley 2014.	Krossá-Kækjudalsá	ISKK.	Zircon	ISKK-3.1	Jan. '13.	R33 zircon (419±1 Ma), Black et al. (2004).	0.00184615	70.7542	0.00373934	6.0497	317.758	161.406	0.489972	1.47643	488.416	5.65031	0.0624546	10.9024	0.0010933	2.0427	0.00948555	61.9652	0.00197681	6.18994	0.0998937	12.916	0.73808	TLC4.
Carley 2014.	Krossá-Kækjudalsá	ISKK.	Zircon	ISKK-30.1	Jan. '13.	R33 zircon (419±1 Ma), Black et al. (2004).	0.00344212	100.115	0.00391773	5.25021	80.3604	32.1226	0.392452	0.650698	483.355	0.89355	0.0244773	30.9911	-0.00148007	-2.76515	0.00836362	35.5783	0.00193583	6.9384	0.195018	13.691	0.176852	TLC4.
Carley 2014.	Krossá-Kækjudalsá	ISKK.	Zircon	ISKK-31.1	Jan. '13.	R33 zircon (419±1 Ma), Black et al. (2004).	1e-32	100	0.00394509	2.5461	354.393	240.822	0.662367	0.261578	473.201	0.932043	0.0289387	15.43	-0.00117817	-2.20108	0.00843208	15.4581	0.00211327	0.932043	0.0602948	13.9078	0.150606	TLC4.
Carley 2014.	Krossá-Kækjudalsá	ISKK.	Zircon	ISKK-32.1	Jan. '13.	R33 zircon (419±1 Ma), Black et al. (2004).	-0.00265774	100.089	0.00379474	4.63019	106.143	42.4733	0.39112	0.566869	497.256	3.35065	0.0256915	26.5965	-0.00139729	-2.61058	0.0186415	58.292	0.0021109	5.80044	0.0995066	13.2887	0.4588	TLC4.
Carley 2014.	Krossá-Kækjudalsá	ISKK.	Zircon	ISKK-33.1	Jan. '13.	R33 zircon (419±1 Ma), Black et al. (2004).	-0.00319791	100.107	0.00370798	5.1049	90.1442	36.367	0.39412	0.607877	505.842	5.16937	0.0783854	19.066	0.00217322	4.06063	0.0349894	36.1279	0.00209503	7.65383	0.211853	12.2149	0.675353	TLC4.
Carley 2014.	Krossá-Kækjudalsá	ISKK.	Zircon	ISKK-34.1	Jan. '13.	R33 zircon (419±1 Ma), Black et al. (2004).	-0.00393299	70.8033	0.00411836	3.97278	135.475	98.8571	0.71971	0.398556	470.693	3.66352	0.0542639	18.3084	0.000537708	1.00459	0.0339016	34.4058	0.00228064	6.07533	0.176578	13.5438	0.524768	TLC4.
Carley 2014.	Krossá-Kækjudalsá	ISKK.	Zircon	ISKK-35.1	Jan. '13.	R33 zircon (419±1 Ma), Black et al. (2004).	1e-32	100	0.00380111	5.04904	87.9083	34.8811	0.391529	1.25312	498.072	0.864578	0.0438413	22.295	-0.000167509	-0.312968	0.0121365	22.3118	0.00200774	0.864578	0.0387499	12.9702	0.195197	TLC4.
Carley 2014.	Krossá-Kækjudalsá	ISKK.	Zircon	ISKK-36.1	Jan. '13.	R33 zircon (419±1 Ma), Black et al. (2004).	0.00223288	100.074	0.0039309	4.155	128.599	56.7689	0.430815	0.496999	473.494	0.770516	0.0401918	19.6279	-0.000415668	-0.776575	0.00154162	672.06	0.00202386	4.42404	0.00658281	13.7057	0.17188	TLC4.
Carley 2014.	Krossá-Kækjudalsá	ISKK.	Zircon	ISKK-37.1	Jan. '13.	R33 zircon (419±1 Ma), Black et al. (2004).	0.00249342	70.7694	0.0036024	3.17072	240.627	135.892	0.550198	0.334806	520.447	3.60359	0.0321256	19.2634	-0.000960561	-1.79474	0.00181324	273.38	0.00183191	4.99441	0.0182691	12.5963	0.463837	TLC4.
Carley 2014.	Krossá-Kækjudalsá	ISKK.	Zircon	ISKK-38.1	Jan. '13.	R33 zircon (419±1 Ma), Black et al. (2004).	0.0026938	70.7741	0.00375593	6.85471	206.14	126.499	0.599592	0.343986	489.144	3.65074	0.0447777	15.9835	-0.000104375	-0.195008	0.000754333	1141.49	0.0019415	5.23414	0.00458534	13.1912	0.49577	TLC4.
Carley 2014.	Krossá-Kækjudalsá	ISKK.	Zircon	ISKK-39.1	Jan. '13.	R33 zircon (419±1 Ma), Black et al. (2004).	0.0233183	33.5914	0.00449004	4.55936	91.7948	40.965	0.426115	3.25002	410.469	6.32258	0.181933	11.5093	0.00918592	17.1626	0.0613066	39.015	0.00137484	26.6927	0.684165	12.9965	0.920264	TLC4.
Carley 2014.	Krossá-Kækjudalsá	ISKK.	Zircon	ISKK-4.1	Jan. '13.	R33 zircon (419±1 Ma), Black et al. (2004).	0.0478168	12.0355	0.024303	12.2331	94.27	78.6289	0.811003	0.52397	77.1134	11.6438	0.737897	3.27287	0.0468437	87.5394	0.0168865	871.839	0.00138005	101.727	0.116681	10.4082	2.8247	TLC4.
Carley 2014.	Krossá-Kækjudalsá	ISKK.	Zircon	ISKK-5.2	Jan. '13.	R33 zircon (419±1 Ma), Black et al. (2004).	-0.000114048	100.004	0.00367656	4.60741	2533.32	5244.58	2.02721	0.68149	503.108	2.62245	0.0469916	4.43068	4.61081e-05	0.0861482	0.0133668	6.08214	0.00199188	2.63106	0.432588	12.7894	0.336859	TLC4.
Carley 2014.	Krossá-Kækjudalsá	ISKK.	Zircon	ISKK-6.1	Jan. '13.	R33 zircon (419±1 Ma), Black et al. (2004).	-0.00256191	100.085	0.00356123	4.57309	116.418	58.4482	0.489895	0.492764	521.59	6.51816	0.0452604	19.8605	-7.05948e-05	-0.131904	0.0225489	44.4173	0.00200899	7.96179	0.17925	12.3636	0.81749	TLC4.
Carley 2014.	Krossá-Kækjudalsá	ISKK.	Zircon	ISKK-7.1	Jan. '13.	R33 zircon (419±1 Ma), Black et al. (2004).	1e-32	100	0.00403532	11.5702	66.0183	27.2108	0.400468	0.705982	446.514	12.0458	0.0560693	22.1343	0.000659096	1.23131	0.0173138	25.1998	0.00223957	12.0458	0.478011	14.2437	1.72933	TLC4.
Carley 2014.	Krossá-Kækjudalsá	ISKK.	Zircon	ISKK-8.1	Jan. '13.	R33 zircon (419±1 Ma), Black et al. (2004).	0.00394103	70.8035	0.00397697	11.4244	138.468	56.5015	0.399338	0.493045	483.362	11.5659	0.0479814	19.9379	0.000112489	0.210165	0.00388319	187.286	0.00191651	12.8624	0.0686777	13.2949	1.54501	TLC4.
Carley 2014.	Krossá-Kækjudalsá	ISKK.	Zircon	ISKK-9.1	Jan. '13.	R33 zircon (419±1 Ma), Black et al. (2004).	1e-32	100	0.00378658	4.88218	94.4912	36.0255	0.373263	0.608743	497.337	2.56791	0.0602591	18.4938	0.000944847	1.76536	0.016706	18.6712	0.00201071	2.56791	0.137533	12.7205	0.373982	TLC4.
																											0.587832

## Sheet: TLC2 long standard
Isotope Ratios of Standards						Ratios are NOT normalized to SBM (interpolated)
(errors are 1s unless otherwise specified)						Spot values for Pb-U-Th Special equations calculated as spot average, for other Task eqns as spot average, for isotope ratios of the same element as spot average, for isotope ratios of different elements as spot average
						Task Name: Zircon Short Hf,YbO m=2 (ppm=MAD)
from file:	TamaraL_TLC2UPb_13012521.57.pd					Uncorrected for secular drift of age standard
						SQUID 2.51.12.07.22, rev. 22 Jul 2012
Spot Name	Date/Time	Hours	Bkrd cts /sec	total 195.8 cts /sec	total 204 cts /sec	total 206 cts /sec	204 /206	% err	207 /206	% err	208 /206	% err	254 /195.8	% err	248 /254	% err	208 /248	% err	248 /195.8	% err	206 /238	% err	254 /238	% err	188 /195.8	% err	195.9 /195.8	% err	238 /195.8	% err	248 /195.8	% err	254 /195.8	% err	Ln UO/U	Ln Pb/U	Expo	SqidNum	7-corr 206Pb /238U calibr. const	% err	Age (Ma)	±1s		7-corr %com 206	7-corr 208Pb* /206Pb*	% err	232Th /238U	% err	204 overcts /sec (fr. 207)
R33_8.1	2013-01-25, 22:37	0	0.05	29763.3	0.133333	661.697	0.000125948	44.7228	0.058132	1.55398	0.227213	1.28702	0.905259	5.19293	0.647189	0.46075	0.00831673	3.03349	0.585443	5.48503	0.116531	4.26428	4.88787	1.27619	0.738184	5.58825	9.05814	5.90682	0.184667	4.05269	0.585443	5.48503	0.905259	5.19293	1.58676	-2.14959	#NAME?	0.15	#NAME?	#NAME?	#NAME?	#NAME?	#NAME?	#NAME?	#NAME?	#NAME?	0.671041	0.526132	#NAME?
R33_7.1	2013-01-25, 23:41	1.067	0.0166667	29074.7	0.0833333	382.479	0.000174309	50.0022	0.0563151	2.07121	0.197776	1.78412	0.509583	3.29061	0.583828	0.619395	0.00857309	1.70593	0.297237	3.17782	0.127349	2.65445	5.04309	0.927746	0.488844	3.46755	10.0787	4.15602	0.100919	3.26673	0.297237	3.17782	0.509583	3.29061	1.61802	-2.06083		1.067	#NAME?	#NAME?	#NAME?	#NAME?	#NAME?	#NAME?	#NAME?	#NAME?	0.608117	0.335407	#NAME?
R33_4.1	2013-01-26, 01:01	2.4	0.05	30074.6	0.1	691.597	7.23017e-05	57.7361	0.0558573	1.5509	0.188047	1.36672	0.947363	4.09201	0.561926	0.587821	0.0080241	2.68938	0.532328	4.52224	0.115396	2.98927	4.84425	0.543623	0.451899	3.89493	11.4877	4.25182	0.195055	3.66187	0.532328	4.52224	0.947363	4.09201	1.57779	-2.15938		2.4	#NAME?	#NAME?	#NAME?	#NAME?	#NAME?	#NAME?	#NAME?	#NAME?	0.580929	0.525242	#NAME?
R33_5.1	2013-01-26, 02:04	3.45	0.0333333	29381.3	0.0666667	858.98	3.88072e-05	70.7114	0.0563742	1.37577	0.158183	1.32918	1.19365	3.58259	0.472533	0.269751	0.00778342	1.43852	0.565577	3.35942	0.116378	3.83997	4.88955	1.27863	0.857927	3.80652	8.49903	4.14764	0.243675	2.42665	0.565577	3.35942	1.19365	3.58259	1.5871	-2.15091		3.45	#NAME?	#NAME?	#NAME?	#NAME?	#NAME?	#NAME?	#NAME?	#NAME?	0.49023	0.235249	#NAME?
R33_1.4	2013-01-26, 03:10	4.55	0.0333333	27893.8	0.0333333	3091.46	-1.72083e-21	9999	0.0552361	0.732037	0.249864	0.565072	4.59277	3.96381	0.753649	0.280163	0.0077137	2.59345	3.46684	3.71163	0.113752	3.54674	4.87409	1.12556	0.816296	5.0742	11.9013	4.74088	0.94431	2.84771	3.46684	3.71163	4.59277	3.96381	1.58393	-2.17373		4.55	#NAME?	#NAME?	#NAME?	#NAME?	#NAME?	#NAME?	#NAME?	#NAME?	0.780846	0.104067	#NAME?
R33_3.1	2013-01-26, 04:14	5.617	0.0166667	29016	0.05	422.594	7.8881e-05	70.7121	0.0552846	2.01191	0.234945	1.58218	0.596057	4.077	0.713311	0.631616	0.00775802	1.50161	0.426985	4.08695	0.115765	3.18818	4.88243	0.839699	0.571286	4.43206	8.57976	4.54066	0.122158	3.46918	0.426985	4.08695	0.596057	4.077	1.58564	-2.15619		5.617	#NAME?	#NAME?	#NAME?	#NAME?	#NAME?	#NAME?	#NAME?	#NAME?	0.739583	0.597424	#NAME?
R33_2.2	2013-01-26, 05:05	6.467	0.0166667	28721.7	0.0333333	417.757	3.98972e-05	100.001	0.056338	1.97238	0.213468	2.68775	0.61041	4.41086	0.66055	0.344469	0.00750731	2.99634	0.403225	4.26897	0.111042	3.79914	4.78878	1.34949	0.564417	4.91229	9.17	4.25156	0.126849	3.47334	0.403225	4.26897	0.61041	4.41086	1.56627	-2.19785		6.467	#NAME?	#NAME?	#NAME?	#NAME?	#NAME?	#NAME?	#NAME?	#NAME?	0.682212	0.295808	#NAME?
R33_2.1	2013-01-26, 06:08	7.517	0.0666667	28333.7	0.05	298.389	-5.5868e-05	100.001	0.0554189	2.36866	0.124888	2.51611	0.419021	3.68838	0.379571	0.500902	0.00808395	2.4961	0.158478	3.38847	0.122927	2.69979	5.00213	0.494109	0.369444	3.84747	9.53121	4.08867	0.0837288	3.05397	0.158478	3.38847	0.419021	3.68838	1.60986	-2.09616		7.517	#NAME?	#NAME?	#NAME?	#NAME?	#NAME?	#NAME?	#NAME?	#NAME?	0.394726	0.43849	#NAME?
R33_1.1	2013-01-26, 07:18	8.683	0.05	32968.3	0.0666667	2339.39	7.12453e-06	100	0.0546921	0.843529	0.231766	1.1032	2.83546	3.63738	0.702498	0.162147	0.0080718	2.30482	1.98133	3.28142	0.120582	3.39744	4.9311	1.03964	0.512507	4.40564	13.0321	4.31836	0.573441	2.65149	1.98133	3.28142	2.83546	3.63738	1.59556	-2.11543		8.683	#NAME?	#NAME?	#NAME?	#NAME?	#NAME?	#NAME?	#NAME?	#NAME?	0.728467	0.13795	#NAME?
R33_1.2	2013-01-26, 08:35	9.967	0.0666667	33424	0.05	885.8	-1.88168e-05	100	0.0553218	1.38443	0.170057	1.28775	1.06497	4.81838	0.496692	0.460395	0.00822652	2.23008	0.529821	4.46022	0.118758	3.30967	4.89401	0.869658	0.398989	6.0593	10.0033	4.1418	0.217703	4.13252	0.529821	4.46022	1.06497	4.81838	1.58801	-2.13067		9.967	#NAME?	#NAME?	#NAME?	#NAME?	#NAME?	#NAME?	#NAME?	#NAME?	0.515498	0.229736	#NAME?
R33-9.1	2013-01-26, 09:38	11.017	0.0166667	31591	0.0833333	1428.74	4.66617e-05	50.0006	0.05579	1.08072	0.221132	0.886147	1.81146	4.08586	0.664916	0.189073	0.00799576	2.52557	1.20435	4.17404	0.118777	4.38124	4.90288	1.31336	0.859596	4.80203	10.8142	4.84618	0.368026	2.8744	1.20435	4.17404	1.81146	4.08586	1.58982	-2.13051		11.017	#NAME?	#NAME?	#NAME?	#NAME?	#NAME?	#NAME?	#NAME?	#NAME?	0.689003	0.162775	#NAME?
																																					0	420.5											#NAME?
	1.565	-2.19533																																			12	420.5											#NAME?
	1.62	-2.04077																																				Wtd Mean of Std Pb/U calibr.	0.0013448										#NAME?
																																						1s error of mean	0.226004
																																						1s external spot-to-spot error	0
																																						MSWD	1.70969
																																						Prob. of fit	0.0722478
																																						rejected spot #s	none
																																							For visualization & preliminary evaluation only
																																					0.5
																																				Assigned Pb/U external err (1s)
[truncated: 21 more columns]

## Sheet: TLC2 short standard 
Isotope Ratios of Standards						Ratios are NOT normalized to SBM (interpolated)
(errors are 1s unless otherwise specified)						Spot values for Pb-U-Th Special equations calculated as spot average, for other Task eqns as spot average, for isotope ratios of the same element as spot average, for isotope ratios of different elements as spot average
						Task Name: Zircon Short Hf,YbO m=2 (ppm=MAD)
from file:	TamaraC_TLC2UPbSht_13012118.42.					Uncorrected for secular drift of age standard
						SQUID 2.51.12.07.22, rev. 22 Jul 2012
Spot Name	Date/Time	Hours	Bkrd cts /sec	total 195.8 cts /sec	total 204 cts /sec	total 206 cts /sec	204 /206	% err	207 /206	% err	208 /206	% err	254 /195.8	% err	248 /254	% err	208 /248	% err	248 /195.8	% err	206 /238	% err	254 /238	% err	188 /195.8	% err	195.9 /195.8	% err	238 /195.8	% err	248 /195.8	% err	254 /195.8	% err	Ln UO/U	Ln Pb/U	Expo	SqidNum	7-corr 206Pb /238U calibr. const	% err	Age (Ma)	±1s		7-corr %com 206	7-corr 208Pb* /206Pb*	% err	232Th /238U	% err	204 overcts /sec (fr. 207)
R33-1.1	2013-01-21, 19:20	0	0.1	24020.7	0.0666667	4327.39	-7.70305e-06	100	0.0553463	1.05925	0.26796	0.94598	6.94217	1.2223	0.824695	0.156748	0.00820011	4.03421	5.72145	1.62989	0.127948	4.51199	5.00652	1.52402	1.20757	2.07857	12.6413	2.43673	1.37657	0.35362	5.72145	1.62989	6.94217	1.2223	1.61074	-2.05613	#NAME?	0.15	#NAME?	#NAME?	#NAME?	#NAME?	#NAME?	#NAME?	#NAME?	#NAME?	0.85811	0.133985	#NAME?
R33-2.1	2013-01-21, 19:30	0.167	0.1	25761	0.1	443.942	-8.33798e-21	9999	0.0547307	3.34148	0.236752	3.14033	0.690289	1.0874	0.714037	0.498714	0.00803203	3.06184	0.492984	0.516323	0.11954	3.54284	4.90507	0.60108	0.63145	4.12342	9.00293	3.19872	0.140687	1.77483	0.492984	0.516323	0.690289	1.0874	1.59027	-2.1241		0.167	#NAME?	#NAME?	#NAME?	#NAME?	#NAME?	#NAME?	#NAME?	#NAME?	0.740332	0.428817	#NAME?
R33-9.2	2013-01-21, 23:27	4.117	0	24974.1	0.0333333	3828.17	8.70738e-06	100	0.0550942	1.12848	0.27945	0.984991	6.04529	0.801422	0.842308	0.986448	0.00812978	4.09729	5.06708	0.329483	0.1208	4.10571	4.87937	1.56492	1.85639	2.45968	11.9327	3.64548	1.22907	0.351645	5.06708	0.329483	6.04529	0.801422	1.58502	-2.11362		4.117	#NAME?	#NAME?	#NAME?	#NAME?	#NAME?	#NAME?	#NAME?	#NAME?	0.8725	0.569689	#NAME?
R33-3.1	2013-01-22, 00:34	5.233	0	23235.1	0.0333333	2924.53	1.13978e-05	100	0.056862	1.26745	0.256039	1.17563	4.62509	1.29175	0.754231	0.496087	0.00900216	2.63679	3.48053	1.22374	0.136163	3.04813	5.11135	0.625462	1.48468	2.23459	12.8651	3.28182	0.902471	1.16767	3.48053	1.22374	4.62509	1.29175	1.63146	-1.9939		5.233	#NAME?	#NAME?	#NAME?	#NAME?	#NAME?	#NAME?	#NAME?	#NAME?	0.787359	0.170777	#NAME?
R33-3.2	2013-01-22, 01:36	6.267	0	24004.3	0.1	2578.97	3.87751e-05	57.7358	0.0559494	1.3602	0.198795	1.40717	3.98414	1.8117	0.624219	0.454394	0.0083531	1.38124	2.48293	1.25219	0.131418	1.47049	4.98104	0.548586	0.877199	3.95851	12.4735	3.3507	0.799008	1.59351	2.48293	1.25219	3.98414	1.8117	1.60564	-2.02937		6.267	#NAME?	#NAME?	#NAME?	#NAME?	#NAME?	#NAME?	#NAME?	#NAME?	0.64884	0.193039	#NAME?
R33-4.1	2013-01-22, 02:43	7.383	0.0333333	22835.4	0	681.988	-4.88791e-05	100.002	0.056332	2.64862	0.253092	2.45149	1.10569	0.440207	0.74963	0.413312	0.00888095	2.3766	0.829317	0.467351	0.135034	2.91389	5.09252	0.512505	0.935786	2.7665	10.3696	1.83054	0.216322	0.562093	0.829317	0.467351	1.10569	0.440207	1.62777	-2.00223		7.383	#NAME?	#NAME?	#NAME?	#NAME?	#NAME?	#NAME?	#NAME?	#NAME?	0.782208	0.354164	#NAME?
R33-5.1	2013-01-22, 03:50	8.5	0.0333333	24094.9	0.0333333	312.485	-1.62858e-20	9999	0.0530666	4.04697	0.111031	5.35056	0.511068	0.537723	0.370125	0.74832	0.00748356	5.29173	0.18909	0.770558	0.12334	4.65541	4.89066	2.35703	0.399801	1.62171	10.5835	0.305659	0.10336	0.731637	0.18909	0.770558	0.511068	0.537723	1.58733	-2.09281		8.5	#NAME?	#NAME?	#NAME?	#NAME?	#NAME?	#NAME?	#NAME?	#NAME?	0.383583	0.657965	#NAME?
R33-6.1	2013-01-22, 04:40	9.333	0	23100.6	0.0333333	1856.3	1.79568e-05	100.001	0.0564336	1.60777	0.225011	1.5725	3.11385	0.36571	0.663634	0.668699	0.00860335	1.53269	2.05901	0.381383	0.12593	2.11752	4.95998	0.300468	0.59224	1.1864	14.149	1.10259	0.628167	0.413924	2.05901	0.381383	3.11385	0.36571	1.6014	-2.07203		9.333	#NAME?	#NAME?	#NAME?	#NAME?	#NAME?	#NAME?	#NAME?	#NAME?	0.689296	0.545628	#NAME?
R33-7.1	2013-01-22, 05:56	10.6	0.0333333	22319.5	0	2273.44	-1.46623e-05	100	0.0551284	1.4564	0.239526	1.36579	3.83879	1.76116	0.719718	0.704622	0.00874507	3.1796	2.74134	2.9948	0.13139	0.414314	4.98809	0.275227	1.27061	2.76808	12.9732	3.03106	0.765413	1.8943	2.74134	2.9948	3.83879	1.76116	1.60705	-2.02958		10.6	#NAME?	#NAME?	#NAME?	#NAME?	#NAME?	#NAME?	#NAME?	#NAME?	0.747833	0.635383	#NAME?
R33-7.2	2013-01-22, 07:03	11.717	0.0333333	21214.3	0.0333333	3057.96	-1.66404e-21	9999	0.0549274	1.26733	0.256224	1.15199	5.33761	0.903216	0.76902	0.192669	0.00865611	1.12033	4.10164	1.91174	0.132084	3.10558	5.07016	0.240417	1.67873	5.21757	13.1647	4.0878	1.05145	1.5093	4.10164	1.91174	5.33761	0.903216	1.62337	-2.02432		11.717	#NAME?	#NAME?	#NAME?	#NAME?	#NAME?	#NAME?	#NAME?	#NAME?	0.801807	0.165051	#NAME?
R33-9.1	2013-01-22, 08:10	12.833	0	23022.1	0.0333333	2956.87	1.12732e-05	100	0.0558784	1.27801	0.199933	1.31505	4.94927	1.36833	0.603836	0.591636	0.0083799	3.19236	2.98091	0.82381	0.127333	3.64621	4.99925	0.902395	1.12576	3.0089	13.1305	2.88964	0.9862	0.380278	2.98091	0.82381	4.94927	1.36833	1.60929	-2.06095		12.833	#NAME?	#NAME?	#NAME?	#NAME?	#NAME?	#NAME?	#NAME?	#NAME?	0.628034	0.179342	#NAME?
R33-8.1	2013-01-22, 09:17	13.95	0	22962.5	0.0333333	174.058	0.000191507	100.006	0.0647316	4.93956	0.107526	7.25669	0.292213	0.671928	0.351338	1.03101	0.00790955	7.20641	0.102427	1.02859	0.1294	1.49209	5.07464	0.990961	0.201863	0.702056	11.7124	1.30482	0.0577275	1.9597	0.102427	1.02859	0.292213	0.671928	1.62426	-2.04485		13.95	#NAME?	#NAME?	#NAME?	#NAME?	#NAME?	#NAME?	#NAME?	#NAME?	0.366274	0.90607	#NAME?
R33-8.2	2013-01-22, 10:24	15.067	0.0333333	22253.4	0.1	821.586	8.11472e-05	70.7126	0.055215	2.45101	0.260689	2.20207	1.39605	1.82318	0.800435	0.367194	0.00833212	2.13797	1.11625	2.32127	0.129675	2.43595	5.02732	1.13033	1.11993	5.22899	9.68497	3.49432	0.276773	2.12024	1.11625	2.32127	1.39605	1.82318	1.61489	-2.04273		15.067	#NAME?	#NAME?	#NAME?	#NAME?	#NAME?	#NAME?	#NAME?	#NAME?	0.833376	0.313513	#NAME?
R33-5.3	2013-01-22, 11:50	16.5	0.0333333	21001.8	0	380.557	-8.75985e-05	100.003	0.0564769	3.54525	0.219204	3.50475	0.703069	0.516297	0.657709	0.559894	0.00833034	3.42603	0.460957	0.58279	0.127281	2.81386	5.06327	0.667701	0.652094	3.13561	10.6551	2.50964	0.138391	0.693003	0.460957	0.58279	0.703069	0.516297	1.62201	-2.06136		16.5	#NAME?	#NAME?	#NAME?	#NAME?	#NAME?	#NAME?	#NAME?	#NAME?	0.685488	0.482117	#NAME?
R33-6.2	2013-01-22, 13:05	17.75	0.0333333	20955.7	0.0666667	1184.78	2.81354e-05	100.001	0.0568745	2.03644	0.22162	2.00643	2.16603	4.3416	0.622139	2.64252	0.00893624	1.95954	1.36866	5.98869	0.12832	2.83884	5.04875	0.386154	0.512764	5.95089	13.1768	1.82519	0.431496	4.73201	1.36866	5.98869	2.16603	4.3416	1.61914	-2.05323		17.75	#NAME?	#NAME?	#NAME?	#NAME?	#NAME?	#NAME?	#NAME?	#NAME?	0.648794	2.05281	#NAME?
																																					0	420.5											#NAME?
	1.585	-2.10949																																			18	420.5											#NAME?
	1.635	-2.00093																																				Wtd Mean of Std Pb/U calibr.	0.00387341										#NAME?
																																						1s error of mean	0.58534
																																						1s external spot-to-spot error	1.87617
																																						MSWD	9.07427
																																						Prob. of fit	2.60694e-20
																																						rejected spot #s	none
																																							For visualization & preliminary evaluation only
																																					1.87617
																																				Assigned Pb/U external err (1s)
[truncated: 21 more columns]

## Sheet: TLC3 short standard
Isotope Ratios of Standards						Ratios are NOT normalized to SBM (interpolated)
(errors are 1s unless otherwise specified)						Spot values for Pb-U-Th Special equations calculated as spot average, for other Task eqns as spot average, for isotope ratios of the same element as spot average, for isotope ratios of different elements as spot average
						Task Name: Zircon Short Hf,YbO m=2 (ppm=MAD)
from file:	TamaraC_TLC5UPbSht_13012214.34.					Uncorrected for secular drift of age standard
						SQUID 2.51.12.07.22, rev. 22 Jul 2012
Spot Name	Date/Time	Hours	Bkrd cts /sec	total 195.8 cts /sec	total 204 cts /sec	total 206 cts /sec	204 /206	% err	207 /206	% err	208 /206	% err	254 /195.8	% err	248 /254	% err	208 /248	% err	248 /195.8	% err	206 /238	% err	254 /238	% err	188 /195.8	% err	195.9 /195.8	% err	238 /195.8	% err	248 /195.8	% err	254 /195.8	% err	Ln UO/U	Ln Pb/U	Expo	SqidNum	7-corr 206Pb /238U calibr. const	% err	Age (Ma)	±1s		7-corr %com 206	7-corr 208Pb* /206Pb*	% err	232Th /238U	% err	204 overcts /sec (fr. 207)
R33-3.1	2013-01-22, 14:58	0	0	24555.5	0	1056.17	1e-32	100	0.0569691	5.86091	0.1874	6.63823	1.69839	3.06797	0.553958	0.356743	0.00852367	2.22032	0.940474	2.84942	0.122853	2.59518	4.91946	1.40979	0.567307	3.22538	11.2826	1.92797	0.344142	2.50392	0.940474	2.84942	1.69839	3.06797	1.5932	-2.09677	#NAME?	0.15	#NAME?	#NAME?	#NAME?	#NAME?	#NAME?	#NAME?	#NAME?	#NAME?	0.57481	0.309069	#NAME?
R33-2.1	2013-01-22, 15:10	0.2	0.0333333	25667.2	0	2303.47	-1.44712e-05	100	0.0560849	1.44169	0.238005	1.37106	3.54378	2.03406	0.69243	0.222133	0.00842619	2.6185	2.45471	2.06944	0.121532	2.96522	4.91572	0.265722	1.10592	5.01106	12.17	4.43987	0.719062	1.60616	2.45471	2.06944	3.54378	2.03406	1.59244	-2.10758		0.2	#NAME?	#NAME?	#NAME?	#NAME?	#NAME?	#NAME?	#NAME?	#NAME?	0.718195	0.191223	#NAME?
R33-2.2	2013-01-22, 17:17	2.317	0	20708.6	0	1341.92	1e-32	100	0.0563653	1.89552	0.11687	6.02831	2.40998	1.69676	0.363893	0.372284	0.00826509	6.73383	0.878402	2.00324	0.130194	2.75241	4.9672	0.7079	0.646062	3.3104	13.2923	3.23856	0.485358	2.03089	0.878402	2.00324	2.40998	1.69676	1.60286	-2.03873		2.317	#NAME?	#NAME?	#NAME?	#NAME?	#NAME?	#NAME?	#NAME?	#NAME?	0.378177	0.327196	#NAME?
R33-2.2B	2013-01-22, 18:16	3.3	0	19694.2	0.0666667	1429.15	4.66476e-05	70.7118	0.0544529	1.85112	0.155613	9.1062	2.78513	1.19693	0.476779	4.80352	0.00849022	2.09653	1.29131	5.75597	0.127398	4.37369	4.99195	1.34346	0.704575	3.26361	13.6263	2.95069	0.553514	1.71499	1.29131	5.75597	2.78513	1.19693	1.60783	-2.06044		3.3	#NAME?	#NAME?	#NAME?	#NAME?	#NAME?	#NAME?	#NAME?	#NAME?	0.495255	3.55813	#NAME?
R33-1.1	2013-01-22, 19:15	4.283	0.0666667	20331	0.0333333	832.795	-4.0029e-05	100.001	0.054696	2.43378	0.215044	2.38962	1.56812	2.24773	0.651143	0.38372	0.00842671	2.33945	1.02037	1.57447	0.127039	2.19713	4.94226	1.03211	0.927215	3.38632	11.4791	3.37222	0.316157	2.22885	1.02037	1.57447	1.56812	2.24773	1.59782	-2.06326		4.283	#NAME?	#NAME?	#NAME?	#NAME?	#NAME?	#NAME?	#NAME?	#NAME?	0.675978	0.330643	#NAME?
R33-1.1B	2013-01-22, 20:17	5.317	0	23472	0.0666667	1033.05	6.4534e-05	70.7122	0.0523886	4.75602	0.21308	6.02564	1.68549	1.60011	0.64543	0.345323	0.00831076	6.41909	1.09074	1.38557	0.129009	2.72535	5.01851	1.49922	0.942371	2.98156	11.2535	2.90819	0.334064	0.484008	1.09074	1.38557	1.68549	1.60011	1.61313	-2.04788		5.317	#NAME?	#NAME?	#NAME?	#NAME?	#NAME?	#NAME?	#NAME?	#NAME?	0.67187	0.297816	#NAME?
R33-4.1	2013-01-22, 21:16	6.3	0.0333333	23035.1	0.0666667	1847.96	1.80383e-05	100.001	0.0558697	1.61251	0.379259	1.23225	3.07672	1.31844	1.13014	0.221655	0.00845247	4.16698	3.48346	1.51204	0.126388	3.12993	4.95183	1.34538	2.35852	3.63046	9.5053	2.74251	0.618285	0.415777	3.48346	1.51204	3.07672	1.31844	1.59976	-2.0684		6.3	#NAME?	#NAME?	#NAME?	#NAME?	#NAME?	#NAME?	#NAME?	#NAME?	1.17384	0.187213	#NAME?
R33-4.1…dup1	2013-01-22, 21:49	6.85	0.0333333	27198.5	0.2	1694.36	9.83674e-05	44.7228	0.0555367	1.69085	0.372869	1.29613	2.68218	2.682	1.12314	0.608509	0.00749619	1.23763	3.02486	2.7308	0.10611	1.8852	4.67093	0.773037	1.97264	4.85435	7.94823	4.20973	0.573596	2.26301	3.02486	2.7308	2.68218	2.682	1.54136	-2.24328		6.85	#NAME?	#NAME?	#NAME?	#NAME?	#NAME?	#NAME?	#NAME?	#NAME?	1.15578	0.53285	#NAME?
R33-4.1B	2013-01-22, 22:48	7.833	0.0333333	23164.4	0	338.603	-9.84533e-05	100.003	0.0547348	3.83913	0.196311	3.90139	0.548237	1.4496	0.623687	0.616144	0.00821934	3.85463	0.340335	0.6206	0.13169	1.07834	5.00128	1.67317	0.546545	1.53429	10.0455	1.50262	0.108887	0.729721	0.340335	0.6206	0.548237	1.4496	1.60969	-2.0273		7.833	#NAME?	#NAME?	#NAME?	#NAME?	#NAME?	#NAME?	#NAME?	#NAME?	0.648656	0.531549	#NAME?
R33-28.1	2013-01-22, 23:47	8.817	0	24664.1	0.0666667	297.321	0.000224225	70.716	0.055723	4.01501	0.170061	4.48607	0.478491	0.541187	0.534676	1.62947	0.00781443	4.45163	0.253694	0.672605	0.122171	5.66903	4.91125	0.74182	0.384614	0.526036	10.5379	2.06856	0.0967174	1.80689	0.253694	0.672605	0.478491	0.541187	1.59153	-2.10234		8.817	#NAME?	#NAME?	#NAME?	#NAME?	#NAME?	#NAME?	#NAME?	#NAME?	0.554347	0.581527	#NAME?
R33-21.1B	2013-01-23, 00:29	9.517	0.0333333	22448.9	0.1	125.14	0.000532879	70.7232	0.052782	6.37678	0.122176	8.23634	0.212312	0.769928	0.391596	1.17599	0.00774573	8.28715	0.0834253	2.2739	0.128812	1.77279	5.0023	1.178	0.157801	0.78861	10.2813	1.98077	0.0421332	1.12804	0.0834253	2.2739	0.212312	0.769928	1.6099	-2.0494		9.517	#NAME?	#NAME?	#NAME?	#NAME?	#NAME?	#NAME?	#NAME?	#NAME?	0.407456	1.03193	#NAME?
R33-28.2	2013-01-23, 01:36	10.633	0	23240.6	0	3008.18	1e-32	100	0.054395	1.27699	0.228004	1.21789	4.80066	0.348233	0.696564	0.200785	0.00858893	3.96176	3.34992	0.701956	0.13334	2.29702	5.02851	0.242216	1.28238	1.93607	13.6912	2.73442	0.95363	0.379997	3.34992	0.701956	4.80066	0.348233	1.61512	-2.01485		10.633	#NAME?	#NAME?	#NAME?	#NAME?	#NAME?	#NAME?	#NAME?	#NAME?	0.725318	0.172635	#NAME?
R33-28.2B	2013-01-23, 02:45	11.783	0.0333333	22755.3	0.0333333	1766.26	-1.83337e-21	9999	0.0561933	1.64474	0.254077	1.5153	2.88739	0.763686	0.760813	0.255188	0.00870332	5.59067	2.19569	0.769676	0.13314	2.79587	5.04231	0.316564	0.899498	1.73801	14.6304	2.10785	0.571536	0.427039	2.19569	0.769676	2.88739	0.763686	1.61786	-2.01635		11.783	#NAME?	#NAME?	#NAME?	#NAME?	#NAME?	#NAME?	#NAME?	#NAME?	0.792482	0.218607	#NAME?
R33-30.1	2013-01-23, 03:53	12.917	0.0333333	22049.4	0.0333333	5474.52	-9.29498e-22	9999	0.0550037	0.944115	0.371978	0.725155	9.20918	3.0827	1.13663	0.295656	0.00855435	2.42596	10.4692	3.0044	0.134224	2.26743	5.10384	0.82429	2.00204	8.32914	12.0271	3.85179	1.80356	2.86853	10.4692	3.0044	9.20918	3.0827	1.62999	-2.00824		12.917	#NAME?	#NAME?	#NAME?	#NAME?	#NAME?	#NAME?	#NAME?	#NAME?	1.18655	0.1105	#NAME?
R33-30.1B	2013-01-23, 05:00	14.033	0	20055.4	0.0333333	3286.55	1.01424e-05	100	0.0564795	1.19761	0.273635	1.06755	6.22049	1.12183	0.831526	1.91679	0.0086308	2.69983	5.10387	2.85398	0.133509	1.57335	5.08964	0.229886	1.94248	5.61151	12.7279	3.38802	1.21588	1.50308	5.10387	2.85398	6.22049	1.12183	1.62721	-2.01358		14.033	#NAME?	#NAME?	#NAME?	#NAME?	#NAME?	#NAME?	#NAME?	#NAME?	0.866728	1.54178	#NAME?
R33-30.1C	2013-01-23, 06:08	15.167	0.0333333	20736.1	0.0666667	3076.29	1.08357e-05	100	0.0561651	1.24801	0.262865	1.12775	5.50561	0.365627	0.795653	0.710476	0.00874729	1.09558	4.36581	0.366857	0.136958	1.09982	5.17377	0.242092	1.15168	3.43572	12.9005	2.19714	1.06368	1.13358	4.36581	0.366857	5.50561	0.365627	1.6436	-1.98808		15.167	#NAME?	#NAME?	#NAME?	#NAME?	#NAME?	#NAME?	#NAME?	#NAME?	0.832288	0.506515	#NAME?
R33-6.1	2013-01-23, 07:23	16.417	0.0333333	20693.7	0.0333333	1856.29	-1.74445e-21	9999	0.0566067	1.60214	0.272913	1.43434	3.3923	0.929635	0.790558	0.647883	0.00889667	3.40287	2.69227	1.69574	0.131897	1.14766	5.06744	0.307739	1.0369	2.08034	14.3004	0.965306	0.671166	1.12436	2.69227	1.69574	3.3923	0.929635	1.62284	-2.02574		16.417	#NAME?	#NAME?	#NAME?	#NAME?	#NAME?	#NAME?	#NAME?	#NAME?	0.8244	0.46866	#NAME?
																																					0	420.5											#NAME?
	1.54	-2.22755																																			17	420.5											#NAME?
	1.66	-1.93413																																				Wtd Mean of Std Pb/U calibr.	0.0024668										#NAME?
																																						1s error of mean	0.347141
																																						1s external spot-to-spot error	1.00485
																																						MSWD	2.56117
																																						Prob. of fit	0.000559314
																																						rejected spot #s	none
																																							For visualization & preliminary evaluation only
																																					1.00485
																																				Assigned Pb/U external err (1s)
[truncated: 21 more columns]

## Sheet: TLC4 short standard
Isotope Ratios of Standards						Ratios are NOT normalized to SBM (interpolated)
(errors are 1s unless otherwise specified)						Spot values for Pb-U-Th Special equations calculated as spot average, for other Task eqns as spot average, for isotope ratios of the same element as spot average, for isotope ratios of different elements as spot average
						Task Name: Zircon Short Hf,YbO m=2 (ppm=MAD)
from file:	TamaraC_TLC4UPbSht_13012109.09.					Uncorrected for secular drift of age standard
						SQUID 2.51.12.07.22, rev. 22 Jul 2012
Spot Name	Date/Time	Hours	Bkrd cts /sec	total 195.8 cts /sec	total 204 cts /sec	total 206 cts /sec	204 /206	% err	207 /206	% err	208 /206	% err	254 /195.8	% err	248 /254	% err	208 /248	% err	248 /195.8	% err	206 /238	% err	254 /238	% err	188 /195.8	% err	195.9 /195.8	% err	238 /195.8	% err	248 /195.8	% err	254 /195.8	% err	Ln UO/U	Ln Pb/U	Expo	SqidNum	7-corr 206Pb /238U calibr. const	% err	Age (Ma)	±1s		7-corr %com 206	7-corr 208Pb* /206Pb*	% err	232Th /238U	% err	204 overcts /sec (fr. 207)
R33-1	2013-01-21, 10:29	0	0.0666667	25866.7	0.1	520.908	6.3999e-05	100.002	0.0547683	6.95442	0.213566	3.06601	0.772896	3.31083	0.657072	0.480882	0.00819207	2.95626	0.5077	3.24486	0.122224	5.61204	4.84903	1.86469	0.62282	3.96162	10.1937	3.3928	0.15846	2.10762	0.5077	3.24486	0.772896	3.31083	1.57878	-2.1019	#NAME?	0.15	#NAME?	#NAME?	#NAME?	#NAME?	#NAME?	#NAME?	#NAME?	#NAME?	0.680107	0.415176	#NAME?
R33-2	2013-01-21, 10:38	0.15	0.0333333	25336.1	0.2	232.649	0.000716488	44.732	0.0523976	4.71601	0.132989	5.71631	0.368988	1.21555	0.411385	0.825661	0.00780931	5.67493	0.15201	0.829079	0.120541	3.82674	4.92154	0.833741	0.249657	2.46229	10.796	2.24234	0.0746878	0.821763	0.15201	0.829079	0.368988	1.21555	1.59362	-2.11577		0.15	#NAME?	#NAME?	#NAME?	#NAME?	#NAME?	#NAME?	#NAME?	#NAME?	0.426817	0.723227	#NAME?
R33-3.1	2013-01-21, 10:49	0.333	0	24598.3	0	1610.66	1e-32	100	0.055778	1.74778	0.21555	1.73589	2.55756	1.35012	0.652911	0.626653	0.00821461	1.68357	1.67498	0.904008	0.123632	4.8305	4.92493	1.30958	1.0583	2.30497	11.5476	1.41871	0.516051	0.419754	1.67498	0.904008	2.55756	1.35012	1.59431	-2.09045		0.333	#NAME?	#NAME?	#NAME?	#NAME?	#NAME?	#NAME?	#NAME?	#NAME?	0.677515	0.59023	#NAME?
R33-4.1	2013-01-21, 11:44	1.25	0.166667	24103.5	0.0666667	224.581	-0.000445604	57.7436	0.0607995	4.50538	0.137449	5.76483	0.36292	1.33788	0.393901	0.866486	0.00880577	5.63639	0.143444	2.04448	0.125974	4.99921	4.9984	1.9974	0.297671	2.56197	10.9989	2.69564	0.0718506	0.851963	0.143444	2.04448	0.36292	1.33788	1.60912	-2.07168		1.25	#NAME?	#NAME?	#NAME?	#NAME?	#NAME?	#NAME?	#NAME?	#NAME?	0.409785	0.760048	#NAME?
R33-6.1	2013-01-21, 13:19	2.833	0.0666667	25461.7	0.0333333	558.934	-5.96445e-05	100.002	0.0559831	2.94176	0.189185	3.11357	0.842359	0.447877	0.577214	1.67392	0.00843737	3.02301	0.481782	0.521354	0.126891	5.10144	4.96487	1.6448	0.509828	1.45796	12.4187	2.30911	0.168136	0.585062	0.481782	0.521354	0.842359	0.447877	1.60239	-2.06443		2.833	#NAME?	#NAME?	#NAME?	#NAME?	#NAME?	#NAME?	#NAME?	#NAME?	0.599473	1.07286	#NAME?
R33-7.1	2013-01-21, 14:09	3.667	0.0333333	25998.1	0.0333333	138.384	-2.34053e-20	9999	0.0524215	6.19437	0.109512	8.38637	0.204344	0.726166	0.356802	1.14853	0.00757612	8.11384	0.0733817	3.30273	0.126385	1.66957	5.00549	1.10479	0.190556	1.81753	10.1823	2.89209	0.0409018	2.20243	0.0733817	3.30273	0.204344	0.726166	1.61054	-2.06843		3.667	#NAME?	#NAME?	#NAME?	#NAME?	#NAME?	#NAME?	#NAME?	#NAME?	0.37139	1.01001	#NAME?
R33-8.1	2013-01-21, 14:59	4.5	0	26434.4	0.0666667	332.646	0.000200413	70.7154	0.0568446	3.82442	0.178637	8.80793	0.482788	2.54454	0.546852	1.63845	0.00836163	4.04744	0.262294	1.33821	0.124777	6.34712	4.91506	1.98477	0.301593	3.49541	10.973	3.65886	0.0975347	0.715609	0.262294	1.33821	0.482788	2.54454	1.5923	-2.08123		4.5	#NAME?	#NAME?	#NAME?	#NAME?	#NAME?	#NAME?	#NAME?	#NAME?	0.567171	0.556377	#NAME?
R33-9.1	2013-01-21, 15:49	5.333	0	25467	0.0666667	313.396	0.000212723	70.7157	0.0539736	3.98523	0.206718	3.99908	0.486168	1.36657	0.602989	0.629222	0.00836358	3.9449	0.29214	0.62912	0.121111	4.60436	4.89199	0.723761	0.491194	1.96096	10.2311	2.11165	0.0987158	0.722542	0.29214	0.62912	0.486168	1.36657	1.5876	-2.11104		5.333	#NAME?	#NAME?	#NAME?	#NAME?	#NAME?	#NAME?	#NAME?	#NAME?	0.624912	0.54462	#NAME?
R33-10.1	2013-01-21, 16:40	6.183	0	24780.1	0.0666667	3353.4	1.98803e-05	70.7111	0.0569974	2.90466	0.224729	3.03553	5.237	1.90428	0.656562	0.189125	0.00847294	6.1677	3.44302	2.47557	0.12522	3.96587	4.96749	1.22781	0.832993	4.71808	13.7712	3.52259	1.05037	1.62586	3.44302	2.47557	5.237	1.90428	1.60291	-2.07769		6.183	#NAME?	#NAME?	#NAME?	#NAME?	#NAME?	#NAME?	#NAME?	#NAME?	0.682326	0.163092	#NAME?
R33-11.1	2013-01-21, 17:30	7.017	0.0333333	24763.6	0.0333333	1190.48	-4.66304e-21	9999	0.0550795	2.02943	0.122343	2.6271	1.84547	1.21125	0.393193	0.378302	0.00779175	2.60518	0.72842	1.91346	0.125454	4.28866	4.91889	1.81696	0.710583	4.09528	11.5425	2.54217	0.372248	0.454617	0.72842	1.91346	1.84547	1.21125	1.59308	-2.07581		7.017	#NAME?	#NAME?	#NAME?	#NAME?	#NAME?	#NAME?	#NAME?	#NAME?	0.408012	0.67479	#NAME?
R33-12.1	2013-01-21, 18:20	7.85	0.0333333	25343.8	0.0666667	1667.9	1.99856e-05	100.001	0.0536997	1.72884	0.189672	1.79795	2.5296	0.358166	0.542533	0.73365	0.00878632	6.86205	1.36715	0.392966	0.124546	3.54802	4.89735	0.316356	0.593392	2.14524	12.8286	2.83639	0.516237	0.413427	1.36715	0.392966	2.5296	0.358166	1.58869	-2.08308		7.85	#NAME?	#NAME?	#NAME?	#NAME?	#NAME?	#NAME?	#NAME?	#NAME?	0.562331	0.549477	#NAME?
																																					0	420.5											#NAME?
	1.5775	-2.10844																																			8	420.5											#NAME?
	1.615	-2.06288																																				Wtd Mean of Std Pb/U calibr.	0.0175852										#NAME?
																																						1s error of mean	0.652081
																																						1s external spot-to-spot error	0
																																						MSWD	0.292741
																																						Prob. of fit	0.983081
																																						rejected spot #s	none
																																							For visualization & preliminary evaluation only
																																					0.5
																																				Assigned Pb/U external err (1s)
[truncated: 21 more columns]
